# Supplementary material for: Pathway-based subnetworks enable cross-disease biomarker discovery
Source: PubMed Central journal article supplement (PMC6232113; doi:10.1038/s41467-018-07021-3), 2018-11-12
Supplement: 41467_2018_7021_MOESM1_ESM.pdf [file 41467_2018_7021_MOESM1_ESM.pdf]

1 **Pathway-Based Subnetworks Enable Cross-Disease Biomarker Discovery**

2 Syed Haider<sup>1,2,14</sup>, Cindy Q .Yao<sup>1,3,4</sup>, Vicky S. Sabine<sup>3</sup>, Michal Grzadkowski<sup>1</sup>,  
3 Vincent Stimper<sup>1</sup>, Maud H.W. Starmans<sup>1,5</sup>, Jianxin Wang<sup>1</sup>, Francis Nguyen<sup>1,4</sup>,  
4 Nathalie C. Moon<sup>1</sup>, Xihui Lin<sup>1</sup>, Camilla Drake<sup>3</sup>, Cheryl A. Crozier<sup>3</sup>, Cassandra L.  
5 Brookes<sup>6</sup>, Cornelis J.H. van de Velde<sup>7</sup>, Annette Hasenburg<sup>8</sup>, Dirk G. Kieback<sup>9</sup>,  
6 Christos J. Markopoulos<sup>10</sup>, Luc Y. Dirix<sup>11</sup>, Caroline Seynaeve<sup>12</sup>, Daniel W. Rea<sup>6</sup>,  
7 Arek Kasprzyk<sup>1</sup>, Philippe Lambin<sup>5</sup>, Pietro Lio<sup>2</sup>, John M.S. Bartlett<sup>3,14</sup>, Paul C.  
8 Boutros<sup>1,4,13,14</sup>

9 <sup>1</sup> Informatics and Biocomputing Program, Ontario Institute for Cancer Research,  
10 Toronto, M5G 0A3, Canada

11 <sup>2</sup> Computer Laboratory, University of Cambridge, Cambridge, CB3 0FD, United  
12 Kingdom

13 <sup>3</sup> Diagnostic Development Program, Ontario Institute for Cancer Research,  
14 Toronto, M5G 0A3, Canada

15 <sup>4</sup> Department of Medical Biophysics, University of Toronto, Toronto, Canada

16 <sup>5</sup> Department of Radiation Oncology (Maastr), GROW-School for Oncology and  
17 Developmental Biology, Maastricht University Medical Center, Maastricht, The  
18 Netherlands

19 <sup>6</sup> Cancer Research UK Clinical Trials Unit, University of Birmingham,  
20 Birmingham, B15 2TT, United Kingdom

21 <sup>7</sup> Leiden University Medical Center, Leiden, The Netherlands

22 <sup>8</sup> University Hospital, Freiburg, Germany

23 <sup>9</sup> Klinikum Vest Medical Center, Marl, Germany

24 <sup>10</sup> Athens University Medical School, Athens, Greece

25 <sup>11</sup> St. Augustinus Hospital, Antwerp, Belgium

26 <sup>12</sup> Erasmus Medical Center-Daniel den Hoed, Rotterdam, The Netherlands

27 <sup>13</sup> Department of Pharmacology and Toxicology, University of Toronto, Toronto,  
28 M5S 1A8, Canada

29 <sup>14</sup> Corresponding authors

30

31

32 **Table of Contents**

33 **Supplementary Methods.....4**

34 **1. Univariate analyses reveal outliers and duplicate profiles in breast cancer.....4**

35 **2. SIMMS’ comparison with other machine learning algorithms and genesets/pathway**

36 **scoring methods .....5**

37 **3. SIMMS’ comparison with breast, colon, NSCLC and ovarian cancer prognostic biomarkers**

38 **.....7**

39 **4. SIMMS-derived PIK3CA signaling residual risk predictor in early breast cancer ..... 8**

40 *4.1 TEAM cohort power calculations..... 8*

41 *4.2 mRNA abundance data processing..... 8*

42 *4.3 Survival modelling ..... 9*

43 *4.4 IHC4 model..... 11*

44 *4.5 Recurrence probabilities..... 11*

45 *4.6 Performance Assessment..... 11*

46 *4.7 Prognostic assessment of SIMMS PI3K modules signature in CT+/- groups ..... 12*

47 **5. Modelling multi-modal datatypes using SIMMS ..... 12**

48 **6. SIMMS R package..... 13**

49 **Supplementary Figure Legends..... 15**

50 **Supplementary Figure 1..... 15**

51 **Supplementary Figure 2..... 16**

52 **Supplementary Figure 3..... 18**

53 **Supplementary Figure 4..... 20**

54 **Supplementary Figure 5..... 21**

55 **Supplementary Figure 6..... 22**

56 **Supplementary Figure 7..... 24**

57 **Supplementary Figure 8..... 24**

58 **Supplementary Figure 9..... 25**

59 **Supplementary Figure 10..... 26**

60 **Supplementary Figure 11..... 27**

|    |                                       |           |
|----|---------------------------------------|-----------|
| 61 | <b>Supplementary Figure 12.....</b>   | <b>28</b> |
| 62 | <b>Supplementary Figure 13.....</b>   | <b>29</b> |
| 63 | <b>Supplementary Figure 14.....</b>   | <b>30</b> |
| 64 | <b>Supplementary Figure 15.....</b>   | <b>31</b> |
| 65 | <b>Supplementary Figure 16.....</b>   | <b>32</b> |
| 66 | <b>Supplementary Figure 17.....</b>   | <b>33</b> |
| 67 | <b>Supplementary Figure 18.....</b>   | <b>34</b> |
| 68 | <b>Supplementary Figure 19.....</b>   | <b>35</b> |
| 69 | <b>Supplementary Figure 20.....</b>   | <b>36</b> |
| 70 | <b>Supplementary Figure 21.....</b>   | <b>37</b> |
| 71 | <b>Supplementary Figure 22.....</b>   | <b>38</b> |
| 72 | <b>Supplementary Figure 23.....</b>   | <b>39</b> |
| 73 | <b>Supplementary Figure 24.....</b>   | <b>40</b> |
| 74 | <b>Supplementary Figure 25.....</b>   | <b>42</b> |
| 75 | <b>Supplementary References .....</b> | <b>44</b> |
| 76 |                                       |           |
| 77 |                                       |           |

## 78 **Supplementary Methods**

### 79 **1. Univariate analyses reveal outliers and duplicate profiles in breast cancer**

80 We collated 14 mRNA abundance breast cancer datasets (**Supplementary**  
 81 **Table 2**). Since these datasets originate from different studies and array  
 82 platforms, comprehensive univariate analyses were performed to identify outlier  
 83 datasets and to find patients duplicated across datasets. First, each dataset was  
 84 pre-processed independently (**Methods section: mRNA abundance and**  
 85 **survival data pre-processing**). Next, genes across all the datasets were  
 86 evaluated for their prognostic ability using a univariate Cox proportional hazards  
 87 model followed by the Wald-test. All the genes were subsequently ranked by the  
 88 Wald-test P value within each study. The top genes across all studies were  
 89 compared on multiple criterion as detailed below:

90 1 - Rank Product

91 The Rank Product<sup>1</sup> of each gene was computed as:

$$RP_g = \sum_{i=1}^k \log(r_{gi})^{\frac{1}{k}} \quad (1)$$

92 Here  $k$  represents the number of studies which had the mRNA abundance  
 93 measure available for gene  $g$ .  $r_i$  is the rank of gene  $g$  in study  $i$ . The overall  
 94 ranking table was used as a benchmark to identify datasets in which a given  
 95 gene was ranked farthest when its rank product was compared to studywise  
 96 ranks. The farthest dataset count was computed for the overall top ranked (100,  
 97 200, 300, ..., 1000, 2000) genes (**Supplementary Figure 3a-e**).

98 2 - Percentile ranks

99 The P value (Wald-test) based ranking was transformed into percentile ranks  
 100 within each study. These ranks were used as a measure of gene's position with  
 101 reference to the benchmark rank derived in the step 1 to evaluate deviation of  
 102 genes' ranks for each study (**Supplementary Figure 3f-i**).



103 3 - Intra- and inter-study correlation

104 The mRNA abundance profiles of common genes across all studies were  
105 extracted and patient wise Spearman rank correlation coefficient was estimated.  
106 The correlation coefficient was used to further analyze intra- and inter-study  
107 correlation in order to identify any outlier studies (**Supplementary Figure 3j-l**).

108 Using the above three assessment mechanisms datasets Li and Loi were  
109 excluded. We also used correlation between individual mRNA abundance  
110 profiles in order to identify potentially redundant patients across studies. This  
111 caters for patients which might have participated in more than one study or  
112 duplicate data used in multiple studies. The survival data of patients with  
113 extremely high correlation coefficient (Spearman's  $\rho \geq 0.98$ ) was matched, and  
114 we found 22 samples<sup>2, 3</sup> having identical survival time and status. These  
115 patients were removed from further analyses (**Supplementary Figure 3m**).

116 Cohorts of primary colon, lung and ovarian cancer patient mRNA profiles were  
117 assembled in similar ways, however, without outlier detection due to relatively  
118 small number of publicly available datasets and no (data curation based)  
119 evidence of sample sharing between studies (**Supplementary Tables 3-5**).

120 **2. SIMMS' comparison with other machine learning algorithms and**  
121 **genesets/pathway scoring methods**

122 In order to benchmark the prognostic ability of subnetworks by SIMMS' model N;  
123 using genes in each subnetwork, we fitted a Cox proportional hazard model  
124 using forward selection, backward elimination (R package: MASS v7.3-47),  
125 LASSO  $L1$  regularization, and ridge regularization (R package: glmnet v2.0-10),  
126 as well as a random survival forest (R package: randomForestSRC v2.5.0). To  
127 tune the hyperparameter of the regularized Cox models and the random survival  
128 forest we applied a grid search algorithm based on cross-validation in the training  
129 sets. The final models were tested in the validation cohorts and predicted risk  
130 scores of the Cox models (and the average cumulative hazards of the random  
131 survival forest) were tested for association with patient outcome. The resulting

132 hazard ratios and respective P values (Wald test) are analog to those presented  
133 in **Supplementary Tables 6b,7b,8b,9b** obtained by SIMMS.

134 To compare SIMMS prognostic performance against other genesets/pathway  
135 summary scoring methods, we chose four methods representing three different  
136 classes of scoring (CORGs: *t-test* based feature selection yielding pathway  
137 activation scores<sup>4</sup>, Guo: geneset's summary scores<sup>5</sup> and PCA score: geneset's  
138 principal component scores<sup>6</sup>). Briefly, CORGs' pathway activation scores with  
139 embedded t-statistic based feature selection were estimated using training  
140 datasets for each cancer type. Using selected features from training set, pathway  
141 activation scores were estimated for validation datasets. For CORGs, good and  
142 poor outcome samples were determined using survival time cut-off of: breast = 5  
143 years, colon = 5 years, NSCLC = 3 years and ovarian = 3 years removing any  
144 samples censored prior to the cut-off time; consistent with other analyses in this  
145 manuscript. Guo et al. scores were estimated using mean and median  
146 expression levels of genes in a given subnetwork, yielding effectively two  
147 different scores which were treated as two independent methods. PCA scores  
148 were estimated by using the first principal component as representative summary  
149 measure of genes in a subnetwork, which is analogous to estimates used in Bild  
150 et al.<sup>6</sup> and gsdScore<sup>7</sup>.

151 For each subnetwork scoring method, Cox proportional hazards model was fitted  
152 on training datasets and applied to predict risk scores using validation datasets.  
153 These predicted risk scores were dichotomised on training set median risk score  
154 and resulting groups were tested for association with patient outcome using Cox  
155 model. The results of Cox model were compared across various methods and  
156 SIMMS Model N.

157 For sensitivity, 'positive' subnetworks were defined as those having at least three  
158 genes significantly associated with patient outcome in the training datasets  
159 (Wald-test  $P < 0.05$ ). Here, mRNA abundance of each gene was dichotomised  
160 into low- and high-risk groups and tested for survival association using a  
161 univariate Cox proportional hazards model. Using validation datasets, the

162 proportion of correctly recovered subnetworks (Wald-test  $P < 0.05$ ) by each  
163 method were regarded as true positive rate.

### 164 **3. SIMMS' comparison with breast, colon, NSCLC and ovarian cancer prognostic** 165 **biomarkers**

166 In order to compare the performance of SIMMS' with existing gene expression-  
167 based breast<sup>8</sup>, colon<sup>9, 10</sup>, NSCLC<sup>11-15</sup> and ovarian<sup>16-19</sup> cancer prognostic  
168 biomarkers, we limited our search to the studies which shared the validation  
169 datasets with those included in our analysis as validation datasets. This selection  
170 criterion enabled unbiased comparison of hazard ratios and P values between  
171 published markers and those identified by SIMMS for the same cohorts unless  
172 specified otherwise. To maintain parity, strictly gene expression-based predictors  
173 estimating hazard ratios were included for comparison with SIMMS. These  
174 results are presented in **Supplementary Table 14**. For breast cancer biomarker,  
175 previously published<sup>8</sup> assessment of 9 breast cancer risk predictors were  
176 compared against the same set of ER+ breast cancer patients in Metabric  
177 Training cohort (n=801). For consistent comparison, SIMMS classifier was  
178 trained on Metabric Validation cohort, and validated on Metabric Training cohort  
179 predicting exactly the same (5-year) overall survival end-point as used by the  
180 Zhao *et al.*<sup>8</sup>. To test the colon cancer 34-gene signature<sup>10</sup> on TCGA cohort, this  
181 signature was re-implemented following the original protocol. Briefly, VMC and  
182 Moffitt sub-cohorts were treated as training and validation sets respectively. The  
183 validation results on the Moffitt cohort (Smith) and TCGA cohort are recorded in  
184 **Supplementary Table 14**. NSCLC validation was limited to lung  
185 adenocarcinomas only. Both NSCLC and ovarian cancer comparisons were  
186 performed in the similar way maintaining the validation cohorts for coherent  
187 comparison. TCGA RNA-Seq data was used as colon and ovarian cancers  
188 validation cohorts, however, panel of other markers used microarray-based  
189 profiles for these two cohorts.  
190 SIMMS identified markers of ER+ breast cancer compared favourably to nine  
191 other breast cancer markers of clinical outcome (**Supplementary Table 14**).

192 SIMMS produced the best prognostic marker for colon cancer by a wide margin  
193 compared to two other markers of patient outcome (**Supplementary Table 14**).  
194 Similar trend of enhanced performance was observed for NSCLC  
195 (adenocarcinomas) markers where SIMMS outperformed seven other markers in  
196 3/4 independent validation studies (**Supplementary Table 14**).

#### 197 **4. SIMMS-derived PIK3CA signaling residual risk predictor in early breast cancer**

##### 198 *4.1 TEAM cohort power calculations*

199 Power calculations were performed on complete TEAM cohort (n = 3,476; events  
200 = 507) and for each of the training (n = 1,734; events = 250) and validation (n =  
201 1,742; events = 257) subsets separately. Power estimates representing the  
202 likelihood of observing a specific HR against the above-mentioned events,  
203 (assuming equal-sized patient groups) were derived using the following formula  
204 (2):

$$z_{power} = \frac{\sqrt{E} \times \ln(HR)}{2} - z(1 - \frac{\alpha}{2}) \quad (2)$$

205 where  $E$  represents the total number of events (DRFS) and  $\alpha$  represents the  
206 significance level which was set to  $10^{-3}$ .  $z_{power}$  was calculated for HR ranging from  
207 1 to 3 with steps of 0.01.

##### 208 *4.2 mRNA abundance data processing*

209 Raw mRNA abundance counts data were pre-processed using R package  
210 NanoStringNorm<sup>20</sup> (v1.1.16). In total, 252 pre-processing schemes were  
211 evaluated; parameterising normalization with respect to six positive controls,  
212 eight negative controls and six housekeeping genes (GUSB, PUM1, SF3A1,  
213 TBP, TFRC and TMED10) followed by global normalization. To identify the

214 optimal pre-processing parameters, two criteria were defined. First, each of the  
215 252 pre-processing schemes was ranked based on their ability to maximize  
216 Euclidean distance of ERBB2 mRNA abundance between HER2-positive and  
217 HER2-negative samples. The process was repeated for 1000 random subsets of  
218 HER2-positive and HER2-negative samples for each of the pre-processing  
219 schemes. Second, using 37 replicates of an RNA pool extracted from 5 randomly  
220 selected anonymized FFPE breast tumour samples, pre-processing schemes  
221 were ranked based on inter-batch variation. To this end, mixed effects linear  
222 models were used and residual estimates were used as a measure of inter-batch  
223 variation (R package: nlme v3.1-113). Cumulative ranks based on these two  
224 criteria were estimated using RankProduct<sup>1</sup> resulting in selection of an optimal  
225 pre-processing scheme of normalisation to the *geometric mean* derived from all  
226 genes followed by *rank normalisation*. Samples with RNA content |z-score| > 6  
227 were discarded as being potential outliers. Only one sample was removed from  
228 the top pre-processing scheme. Six samples were run in duplicates, and their  
229 raw counts were averaged and subsequently treated as a single sample. Training  
230 and validation cohorts were created by randomly splitting 297 NanoString  
231 nCounter cartridges into two groups (**Supplementary Table 20**), which ensures  
232 that there are no batch-effects shared between the two cohorts.

### 233 *4.3 Survival modelling*

234 Univariate survival analysis of mRNA abundance profiles was performed by  
235 median-dichotomizing every gene's mRNA abundance into high- and low-  
236 abundance groups (**Supplementary Table 16**), except for *ERBB2* where risk

237 groups were determined via expectation-maximization clustering ( $k=2$ ) because  
238 of the presence of a well-established sub-population of *ERBB2* expressing  
239 cancers (<15%) which are regarded as HER2/*ERBB2* positive tumours. Survival  
240 analysis of clinical variables modelled age as a binary variable (dichotomized at  
241 age  $\geq 55$  as a surrogate for menopausal status), while grade, nodal status and  
242 tumour size were modelled as ordinal variables (**Supplementary Table 17**). For  
243 mRNA and IHC4 models, tumour size was treated as a continuous variable.  
244 Univariate survival analysis of mutational profiles (*AKT1*, *PIK3CA* and *RAS*;<sup>21</sup>)  
245 was performed by dichotomizing patients into mutant and wild-type groups.  
246 Risk score profiles (**Methods**) of patients in the Training cohort were used to fit a  
247 multivariate Cox proportional hazards model alongside clinical variables. Given  
248 the small number of variables to select from (continuous = 9, factors = 3) and a  
249 mix of continuous and ordinal variables, we chose backwards step-wise  
250 refinement algorithm (AIC penalty term:  $k = 1$  degrees of freedom) and created a  
251 module-based risk model (**Supplementary Table 19**). The parameters estimated  
252 by the multivariate model (Training cohort) were applied to the patients in the  
253 Validation cohort generating per-patient risk score. These risk scores  
254 (continuous) were grouped into quartiles using the thresholds derived from the  
255 Training cohort, and resulting groups were subsequently evaluated through  
256 Kaplan-Meier analysis. All models were trained and validated using DRFS  
257 truncated to 10 years as an end-point. All survival modelling was performed in  
258 the R statistical environment (R package: survival v2.37-4).

259 *4.4 IHC4 model*

260 IHC4-protein risk scores were calculated as described by Cuzick *et al.*<sup>22</sup>, and  
261 then adjusted for clinical covariates (age, nodal status, grade and tumour size).  
262 Model predictions (continuous risk scores) were separated into quartiles (**Figure**  
263 **5c**) and analysed using Kaplan-Meier analysis and multivariate Cox proportional  
264 hazards model adjusted for clinical variables.

265 *4.5 Recurrence probabilities*

266 Recurrence probabilities at 5 years were estimated by binning the predicted risk  
267 scores in 25 equal groups. For each group, recurrence probability  $R_{(t)}$  was  
268 estimated as  $1-S_{(t)}$ , where  $S_{(t)}$  is the Kaplan-Meier survival estimate at year 5.  
269 The  $R_{(t)}$  estimates of 25 groups were smoothed using local polynomial regression  
270 fit. The predicted estimates were plotted against the median risk score of each  
271 group except the first and last group, where the lowest risk score and 99th  
272 percentile were used, respectively.

273 *4.6 Performance Assessment*

274 Performance of survival models was compared through area under the *receiver*  
275 *operating characteristic* (ROC) curve. Significance of difference between the  
276 ROC curves was assessed through permutation analysis (10,000 permutations  
277 by shuffling the risk scores while maintaining the order of survival objects).  
278 Patients censored before 5 years (Training cohort: n = 192, Validation cohort: n =  
279 181) were eliminated from sampling. For percentage concordance analysis,  
280 patients with a relapse (after removing the afore-mentioned patients) were  
281 considered as high risk and the rest of the patients were classed as low risk

282 patients. Median dichotomised risk groups determined by PIK3CA predictor and  
283 IHC4 predictor were compared against the high and low risk patients. The  
284 percentage of predictions matching the high and low risk groups were regarded  
285 as concordant. ROC analysis was implemented using R packages pROC  
286 (v1.6.0.1) and survivalROC (v1.0.3). Using the same median dichotomised risk  
287 groups and actual high and low risk groups, Net reclassification improvement for  
288 PIK3CA predictor over IHC4 predictor was estimated using the R package  
289 PredictABEL (v1.2-1).

#### 290 *4.7 Prognostic assessment of SIMMS PI3K modules signature in CT+/- groups*

291 SIMMS-derived PI3K modules signature was evaluated in chemotherapy-  
292 stratified groups without the prior knowledge of nodal status. Patients in the  
293 highest risk quartile (Q4) showed significantly decreased survival rate compared  
294 to low risk patients, independent of whether they received chemotherapy (Q4 vs.  
295 Q1 HR=11.07, 95%CI: 3.47-35.26; P=5.29x10<sup>-11</sup>) (**Supplementary Figure 24e**)  
296 or did not (Q4 vs. Q1 HR=9.74 95%CI: 5.58-17.02; P=1.66x10<sup>-29</sup>)  
297 (**Supplementary Figure 24f**).

### 298 **5. Modelling multi-modal datatypes using SIMMS**

299 Recent studies conducted by TCGA have generated datasets on matched  
300 genomic and transcriptomic profiles including mutations, copy-number aberration  
301 (CNA), DNA methylation and mRNA abundance<sup>17, 23</sup>. These datasets can  
302 potentially lead to the discovery of new biomarkers bridging the gap between  
303 multi-modal molecular features and clinical covariates. To test this, we curated  
304 previously published pathway modules (MEMo<sup>24</sup>) from TCGA studies harbouring  
305 multiple aberrations (e.g. somatic mutations, somatic copy-number aberrations,  
306 dysregulated mRNA abundance levels, and DNA methylation levels)<sup>17, 25-27</sup>. The



307 combined database was composed of 23 breast, 1 colorectal, 8 kidney renal  
308 clear cell and 3 ovarian cancer modules (**Supplementary Table 21**). Using these  
309 modules, SIMMS' (Model N) breast cancer risk predictors were created using  
310 1000 randomly generated subsets (50% samples) of Metabric cohort and  
311 validated on the held-out Metabric subsets as well as TCGA breast cancer  
312 cohort. Similarly, 1000 randomly generated subsets (50% samples) of TCGA  
313 colorectal, kidney renal clear cell carcinoma and ovarian cancers were used to  
314 train and validate (50% held-out samples) the prognostic ability of each of the  
315 subnetwork modules. The results of 1000 models per cancer type were  
316 summarised using Fisher's method (Fisher's combined probability test) resulting  
317 in a chi-square estimate and a P value. We used molecular features based on  
318 mRNA and CNA as gene-level properties. Copy number levels -2 (homozygous  
319 deletion) and -1 (heterozygous deletion) were collapsed into one group, whilst  
320 gene copy-number levels 1 (gain) and 2 (amplification) were collapsed into a  
321 single group. Copy-number levels were modelled using Cox proportional hazards  
322 model and compared against the baseline copy number of 0 (diploid). Additional  
323 filter of minimum 3% copy-number aberration frequency in the cohort in at least  
324 one group (gain/amplification and deletion) was applied prior to estimating  
325 parameters for each gene, failing which would mean gene's copy-number  
326 changes would not contribute to SIMMS' risk scores. Overall survival was used  
327 as survival end-point for all cancer types analysed in the multi-modal modelling.

## 328 **6. SIMMS R package**

329 SIMMS is implemented in R and is available under the GNU General Public  
330 License (GPL) version 2 through CRAN: [https://cran.r-](https://cran.r-project.org/web/packages/SIMMS)  
331 [project.org/web/packages/SIMMS](https://cran.r-project.org/web/packages/SIMMS). SIMMS is generic and can work with any  
332 combination of molecular features and interaction networks. It provides an  
333 extendible framework to support user-defined parameter estimation and  
334 classification algorithms. The R package of SIMMS offers three key features: (i)  
335 support for multiple datatypes (mRNA, methylation, CNA etc), (ii) support for  
336 user-defined networks, and (iii) support for user-defined methods for quantifying  
337 dysregulation of a subnetwork. For (i), users can supply the location and names

338 of the files they would like to analyze with SIMMS. For (ii), a text file describing  
339 networks in a tab-delimited format can be supplied as an input to SIMMS, see  
340 `pathway_based_networks*.txt` files that comes as a part of R package. For (iii),  
341 the package offers an interface function `'derive.network.features'` that accepts a  
342 parameter `'feature.selection.fun'` for user-defined function name (see code  
343 snippet below). By default, the function `'calculate.network.coefficients'` is called to  
344 estimate MDS and risk scores for Mode N, Model E and Mode N+E as described  
345 in this paper. However, users can easily write their own algorithms and simply  
346 use them with SIMMS as a plug and play component. For details, see package  
347 manual and vignettes.

348

```
349 derive.network.features <- function(  
350     data.directory = ".",  
351     output.directory = ".",  
352     data.types = c("mRNA"),  
353     feature.selection.fun = "calculate.network.coefficients",  
354     feature.selection.datasets = NULL,  
355     feature.selection.p.thresholds = c(0.05),  
356     subset = NULL, ...  
357 );
```

358

359 **Supplementary Figure Legends**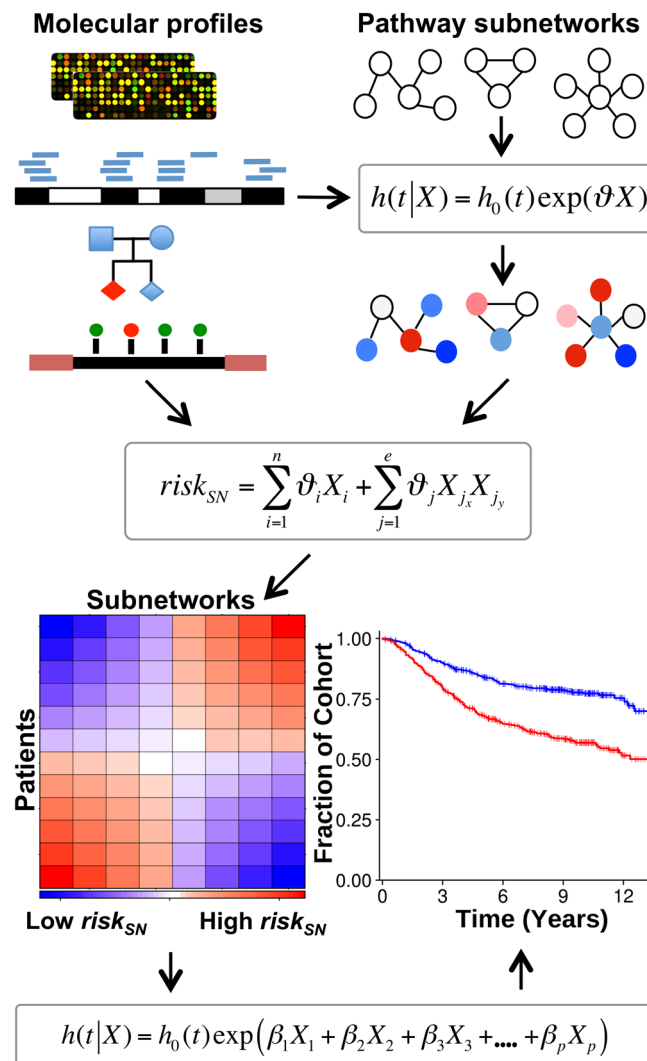

360

361 **Supplementary Figure 1**

362 **Schematic overview of SIMMS.** Subnetwork modules were extracted from NCI-  
 363 Nature/Biocarta/Reactome curated pathways by isolating protein-protein  
 364 interaction networks within a pathway. Molecular profiles were systemised and  
 365 split into independent training and validation sets. Each extracted subnetwork  
 366 was scored (module-dysregulation score) using 3 different models and ranked.  
 367 High-ranking subnetworks were used to compute a patient-wise risk score. Most  
 368 optimal combination of predictive subnetworks was selected using a machine

369 learning algorithm with built-in options of generalized linear models with elastic-  
370 nets parameter alpha ( $\alpha$ ) supporting ridge to LASSO  $L1$ -regularization ( $\alpha \in [0,1]$ ),  
371 Backward elimination and Forward selection algorithms, resulting in a  
372 multivariate subnetwork-based classifier. The classifier is then tested on  
373 independent validation sets.

374

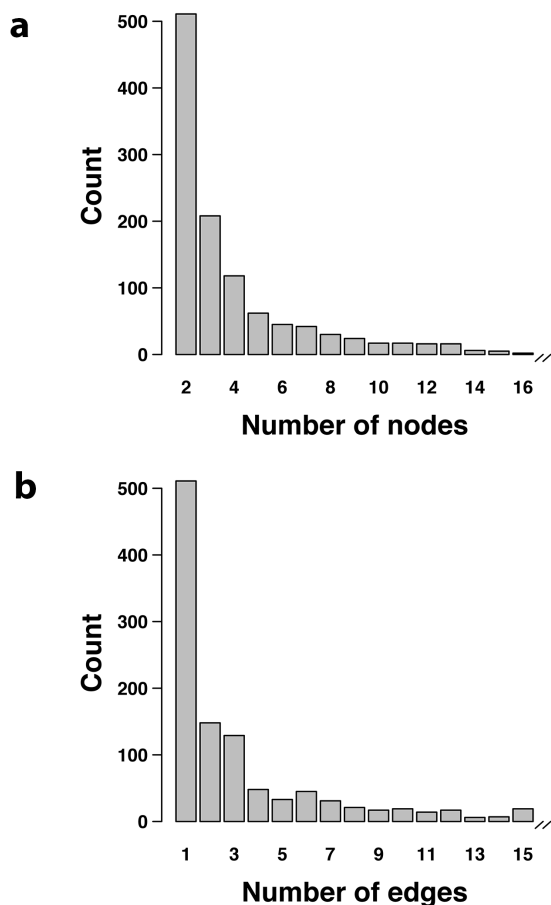

375

### 376 [Supplementary Figure 2](#)

377 **Summary of pathways database.** Distribution of nodes (a) and edges (b)  
378 across all subnetwork modules extracted from NCI-Nature curated pathways  
379 (Reactome and Biocarta inclusive).

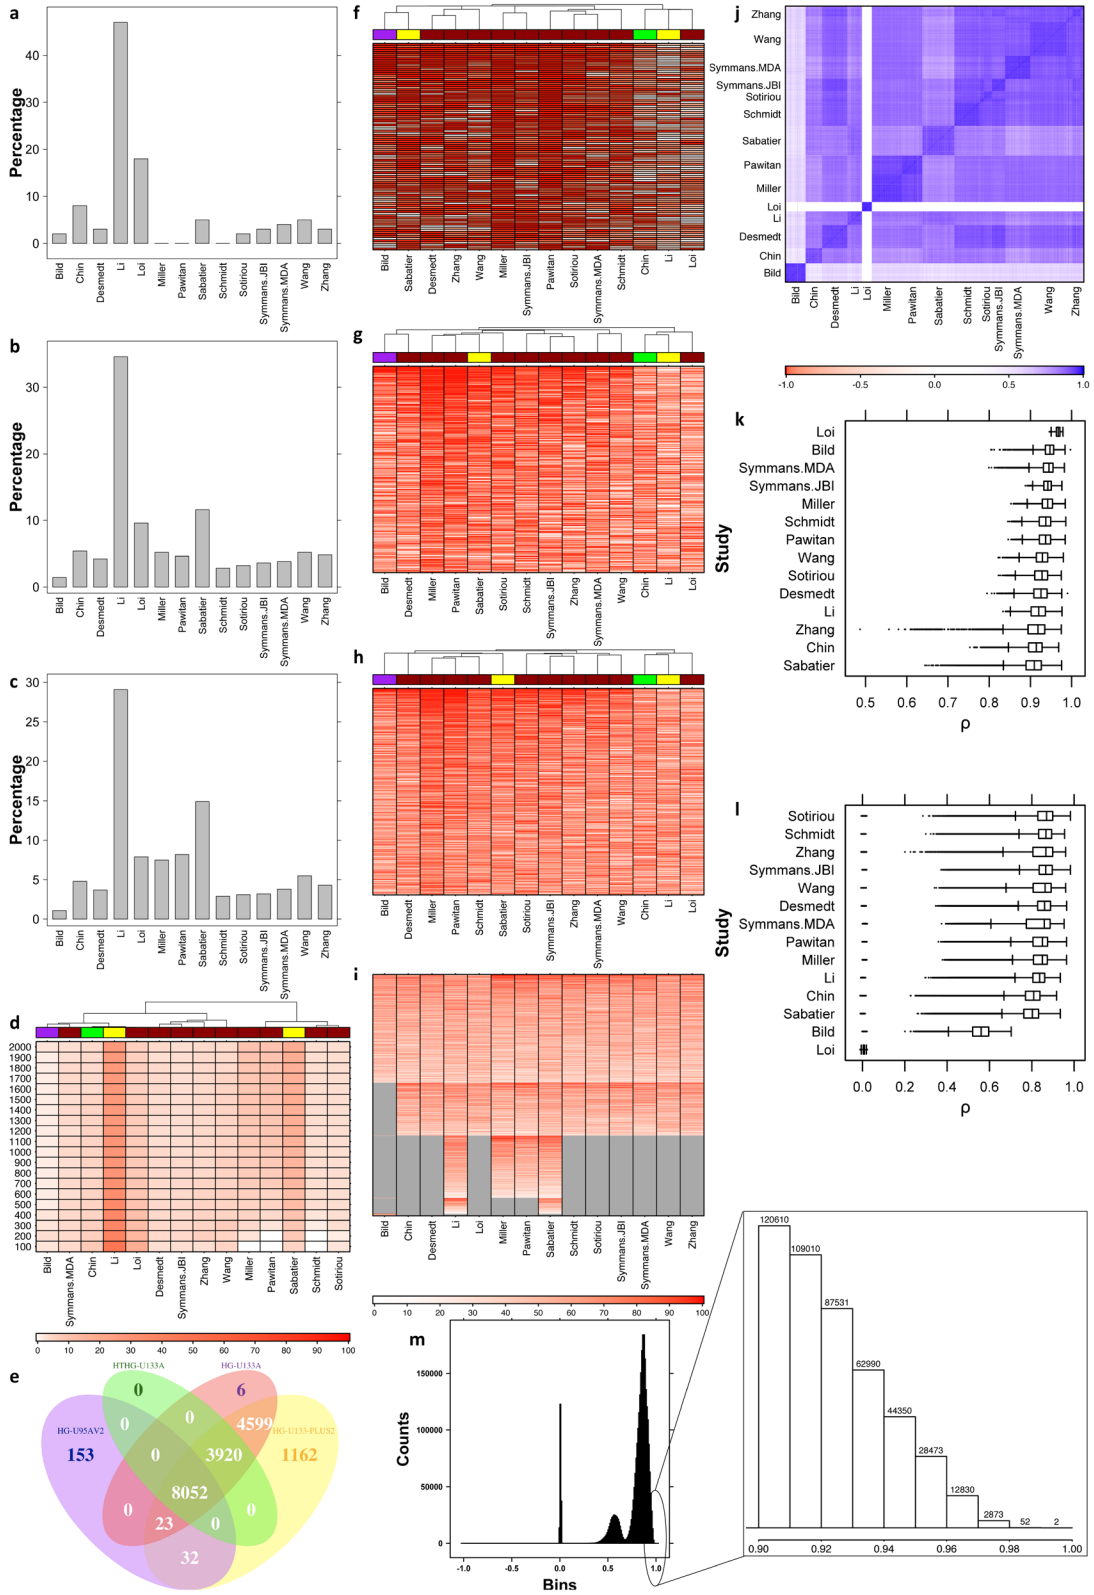

380

381 **Supplementary Figure 3**

382 **Quality assessment and identification of repeated patient profiles. (a,b,c)** A  
383 univariate Cox model was fit to each gene in each study in the breast cancer  
384 cohort. Genes were ranked according to their P value (Wald-test), and a  
385 cumulative rank for all the genes was estimated using the *rank product* for each  
386 gene. The top ranked 100 (a), 500 (b) and 1,000 (c) genes were used to identify  
387 the study in which each gene was farthest away from the cumulative rank. The  
388 frequency of a study being farthest was recorded for each of the top ranked 100,  
389 500 and 1,000 genes. Li and Loi datasets seem to be notable outliers. As the  
390 threshold is relaxed, Sabatier dataset also begins to show deviation compared to  
391 other datasets.

392

393 **(d)** Heatmap showing a summary of barplots (a-c) of the top ranked (rank  
394 product) 100 to 2000 genes with the percentage measure as the frequency of  
395 each dataset being the farthest from the rank product of top *n* genes. The  
396 covariates represent different microarray platforms: HG-U95AV2=purple, HTHG-  
397 U133A=green, HG-U133A=red, HG-U133-PLUS2=yellow.

398

399 **(e)** 4-way Venn diagram representing overlap of genes across the four Affymetrix  
400 array platforms used in the 14 breast cancer datasets included in this study. Note  
401 that the Bild dataset (array platform: HG-U95AV2) has the least number of genes  
402 (8,260) with 8,052 genes that exist across all array platforms. The analysis in a-d  
403 was done on this common gene set only.

404

405 **(f,g,h)** Gene ranks transformed into percentile ranks within all studies. The rank  
406 product based top 100 (f), 500 (g), and 1,000 (h) genes shown in terms of their  
407 percentile rank within each study. Li, Loi and Chin datasets clustered together  
408 and had lower percentile ranks compared to other datasets. However, Sabatier's  
409 percentile ranks were similar to other datasets thereby deemed suitable for  
410 inclusion in this study.

411

412 **(i)** Summary heatmap of percentile ranks across all studies, ordered by groups of  
413 genes common across studies, thereby maintaining coherent comparison of  
414 ranks.

415

416 **(j)** Heatmap of Spearman correlation between patients' mRNA abundance  
417 profiles. Loi dataset quite clearly shows weak correlation with the other datasets,  
418 again reflecting unusual expression patterns compared to other datasets.

419

420 **(k,l)** Box-whisker plots of intra- (k) and inter-study (l) correlation between  
421 patients' mRNA abundance profiles. The results show distinctively strong  
422 correlation within Loi dataset (k) and weak correlation between Loi and other  
423 datasets (l). Boxplot lines show lower quartile, median and upper quartile.  
424 Whiskers extend to the point closest to the upper/lower quartile  $\pm (1.5 \times \text{IQR})$ .

425

426 **(m)** Histogram of Spearman correlation of patients' mRNA abundance profiles.  
427 From left to right, the first peak represents correlation between Loi and other  
428 datasets. The second peak represents correlation between Bild and other  
429 datasets, while the third peak constitutes the correlation between the remaining  
430 datasets. The survival data of highly correlated profiles (zoomed in panel,  $0.98 \leq$   
431  $\rho \leq 1.00$ ) was further inspected, resulting in 22 patients that were found in both  
432 Sotiriou and Symmans (JBI) datasets having identical survival data. These were  
433 removed from Symmans (JBI) dataset for further analysis.

434

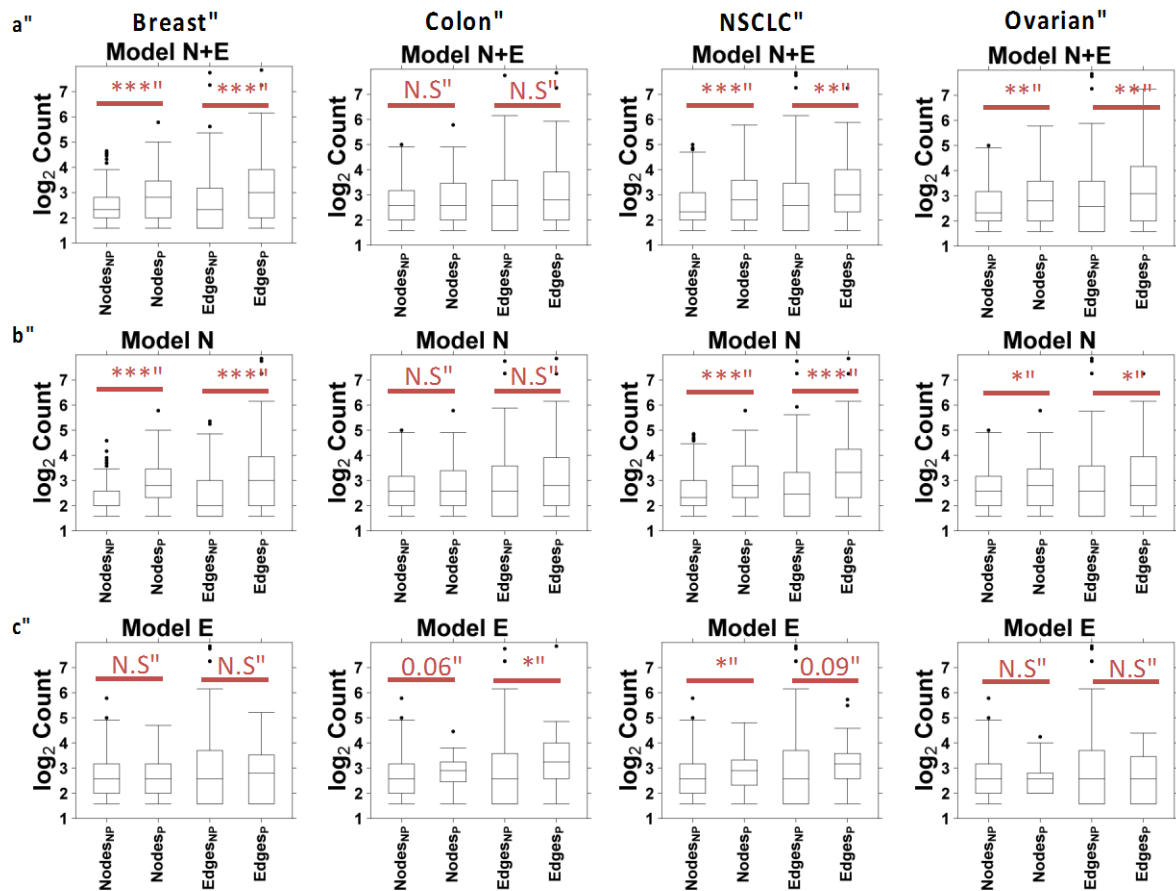

435

436 **Supplementary Figure 4**

437 **Distribution of prognostic ability versus the size of subnetworks. (a-c)** For  
 438 each of the three scoring schemes *i.e.* Model N+E, Model N and Model E (see  
 439 Methods), distribution of subnetwork size for prognostic (**P**) (Wald test  $P < 0.05$ ;  
 440 validation cohorts) and not prognostic (**NP**) subnetwork modules. Size of a  
 441 subnetwork was defined in terms of number of nodes and number of edges.  
 442 Pairwise comparisons were performed using Wilcoxon rank sum test (\*  $P < 0.05$ , \*\*  
 443  $P < 0.01$ , \*\*\*  $P < 0.001$ , N.S.  $P > 0.1$ ). Boxplot lines show lower quartile, median and  
 444 upper quartile. Whiskers extend to the point closest to the upper/lower quartile  $\pm$   
 445  $(1.5 \times \text{IQR})$ .



446

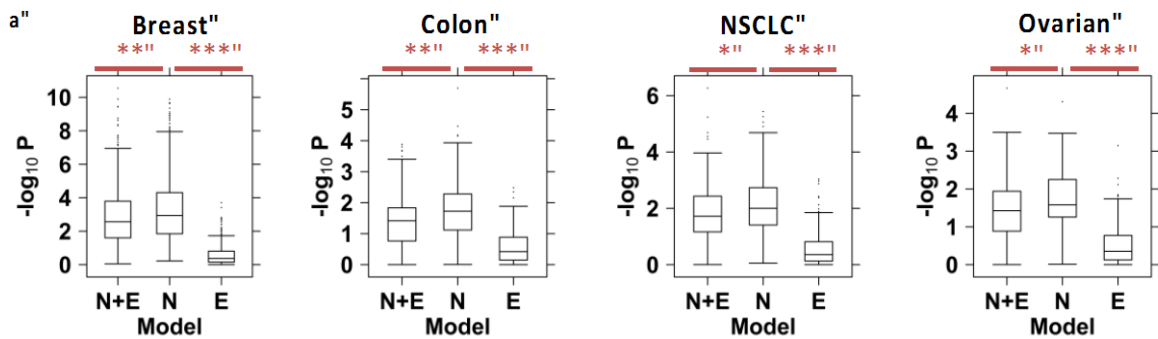

447

448 **Supplementary Figure 5**

449 **Prognostic ability of SIMMS' models (a)** Distribution of prognostic ability ( $-\log_{10} P$ ) of subnetwork modules which were significant (Wald test  $P < 0.05$ ) in at  
 450 least one scoring scheme (Model N+E, Model N and Model E), in respective  
 451 cancer type.  $-\log_{10} P$  values were compared using one-way ANOVA ( $P < 0.05$ )  
 452 followed by Tukey HSD test. Tukey HSD test's adjusted  $P$  values for only Model  
 453 N vs Model N+E and Model E are displayed (\*  $P < 0.05$ , \*\*  $P < 0.01$ , \*\*\*  $P < 0.001$ ).  
 454 Boxplot lines show lower quartile, median and upper quartile. Whiskers extend to  
 455 the point closest to the upper/lower quartile  $\pm (1.5 \times \text{IQR})$ .  
 456

457

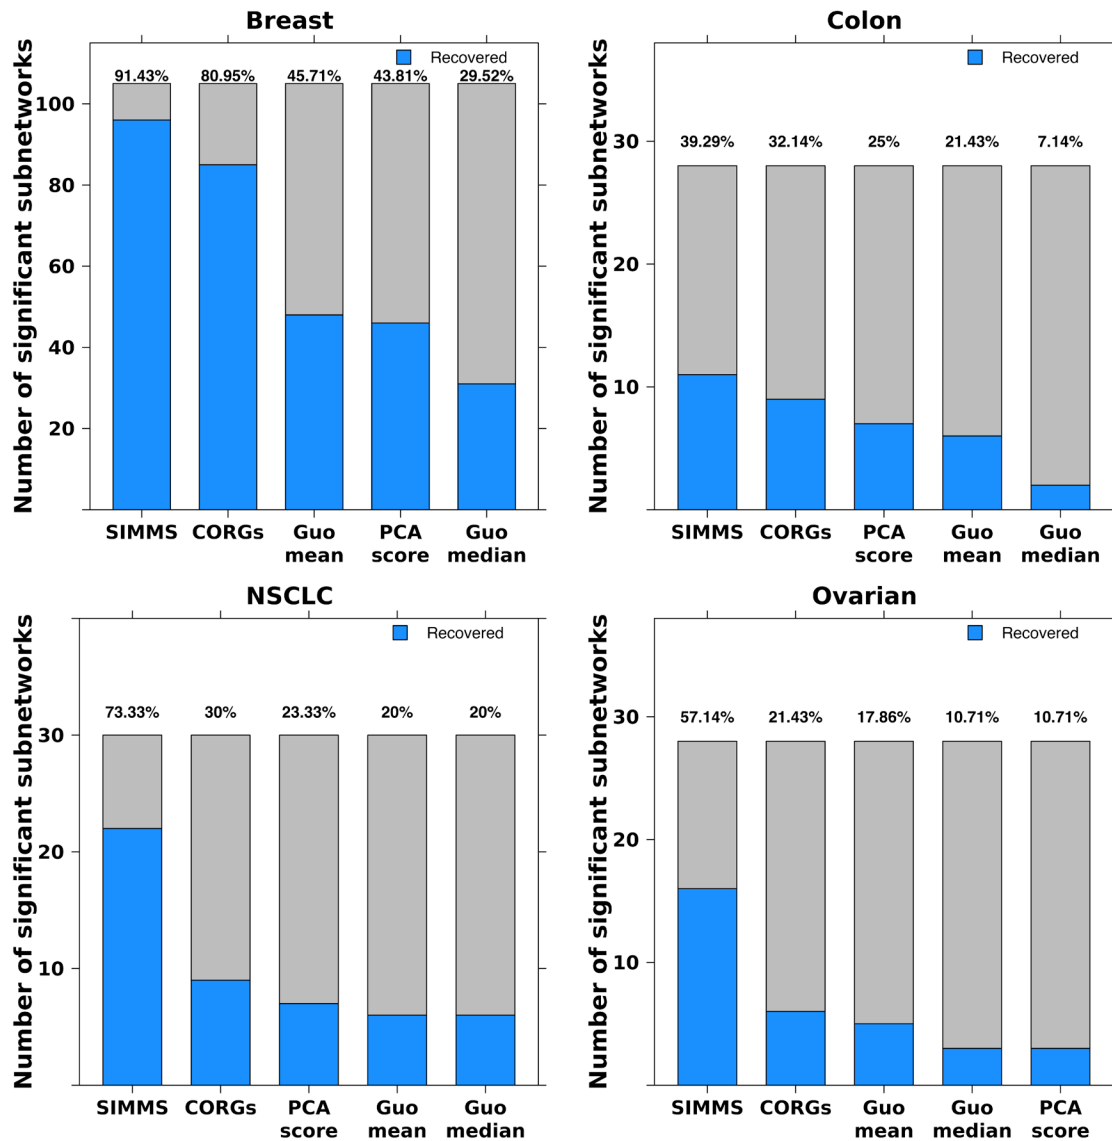

458

459 **Supplementary Figure 6**

460 **Comparison of subnetwork scoring methods.** Sensitivity assessment of  
 461 correctly recovered 'positive' subnetwork modules (those likely to be associated  
 462 with patient outcome) by various subnetwork/pathway scoring methods. Height of  
 463 each bar represents total number of 'positive' subnetworks, while the blue colour  
 464 shows proportion of correctly recovered 'positive' subnetworks. Numbers above  
 465 the bars represent % true positive rate.

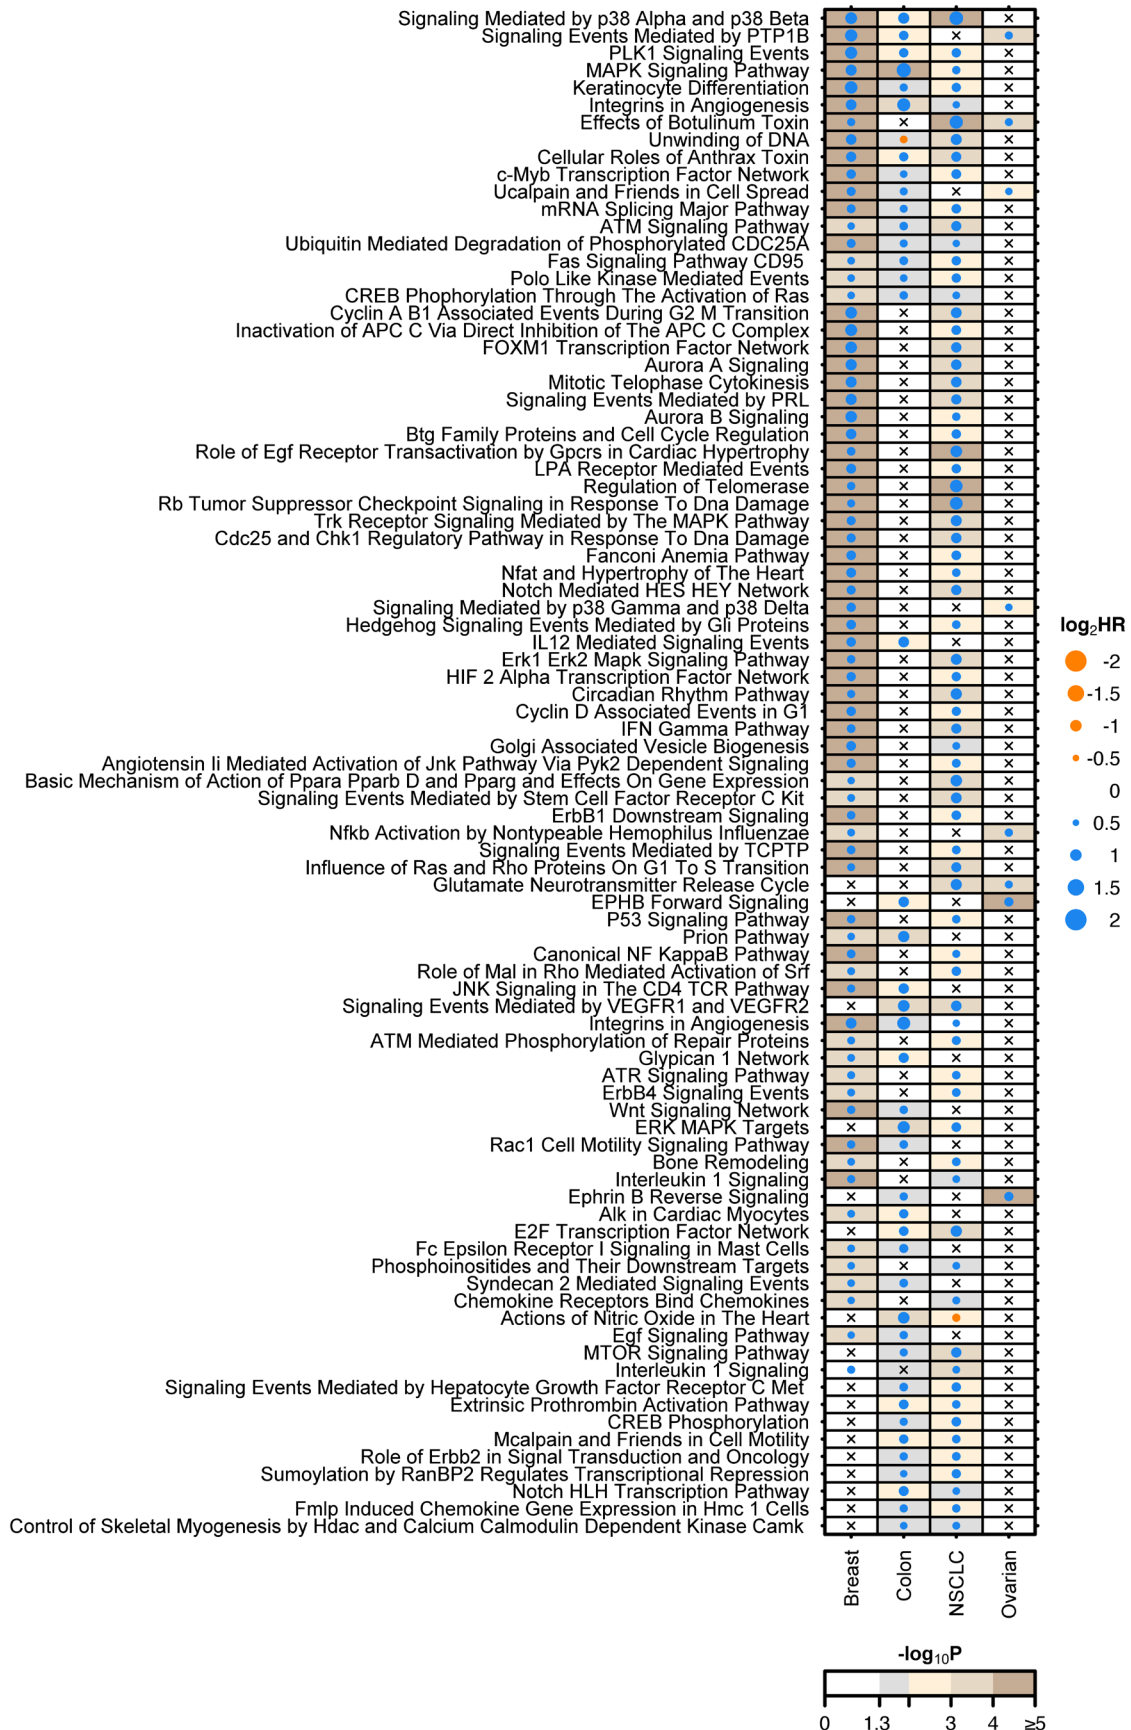

467 **Supplementary Figure 7**

468 **Prognostic assessment of SIMMS' predicted risk scores.** Dot plot of hazard  
 469 ratios and P values of subnetwork modules significant in at least 2/4 cancer  
 470 types. A Cox proportional hazards model was fitted to dichotomous risk scores  
 471 (threshold derived from the training cohort) across the entire validation cohort.  
 472 Crosses represent absence of subnetwork module from a particular cancer type.

473

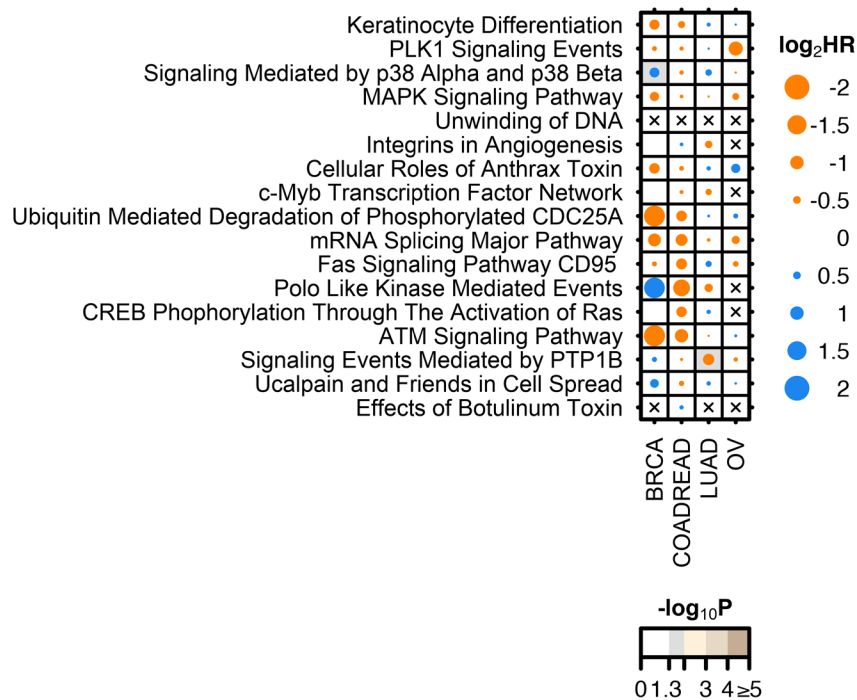

474

475 **Supplementary Figure 8**

476 **Prognostic assessment of mutation burden.** Dot plot of hazard ratios and P  
 477 values of subnetwork modules in **Figure 1i**. Using TCGA datasets for breast,  
 478 colorectal, lung adenocarcinoma and ovarian cancers; for each of these  
 479 subnetwork modules (using mutations in genes involved), patients were assigned  
 480 to mutant group if any gene in the subnetwork was mutated, otherwise to non-  
 481 mutant group. A Cox proportional hazards model was fitted to test association of  
 482 these groups with patient outcome.

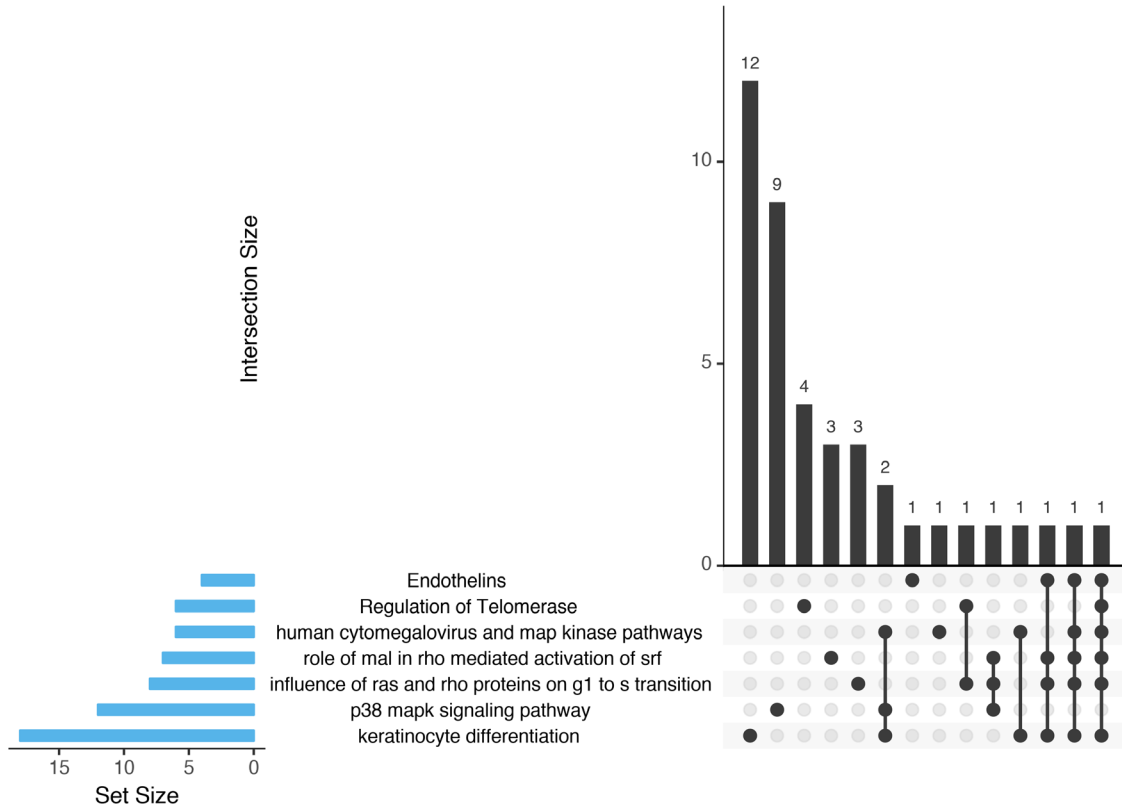

483

484 **Supplementary Figure 9**

485 **Overlap of genes in subnetworks with both prognostic and predictive**  
 486 **ability.** Upset plot showing overlap of genes between subnetworks which  
 487 showed significant prognostic as well as predictive (platinum response)  
 488 association in TCGA ovarian cancer cohort.

489

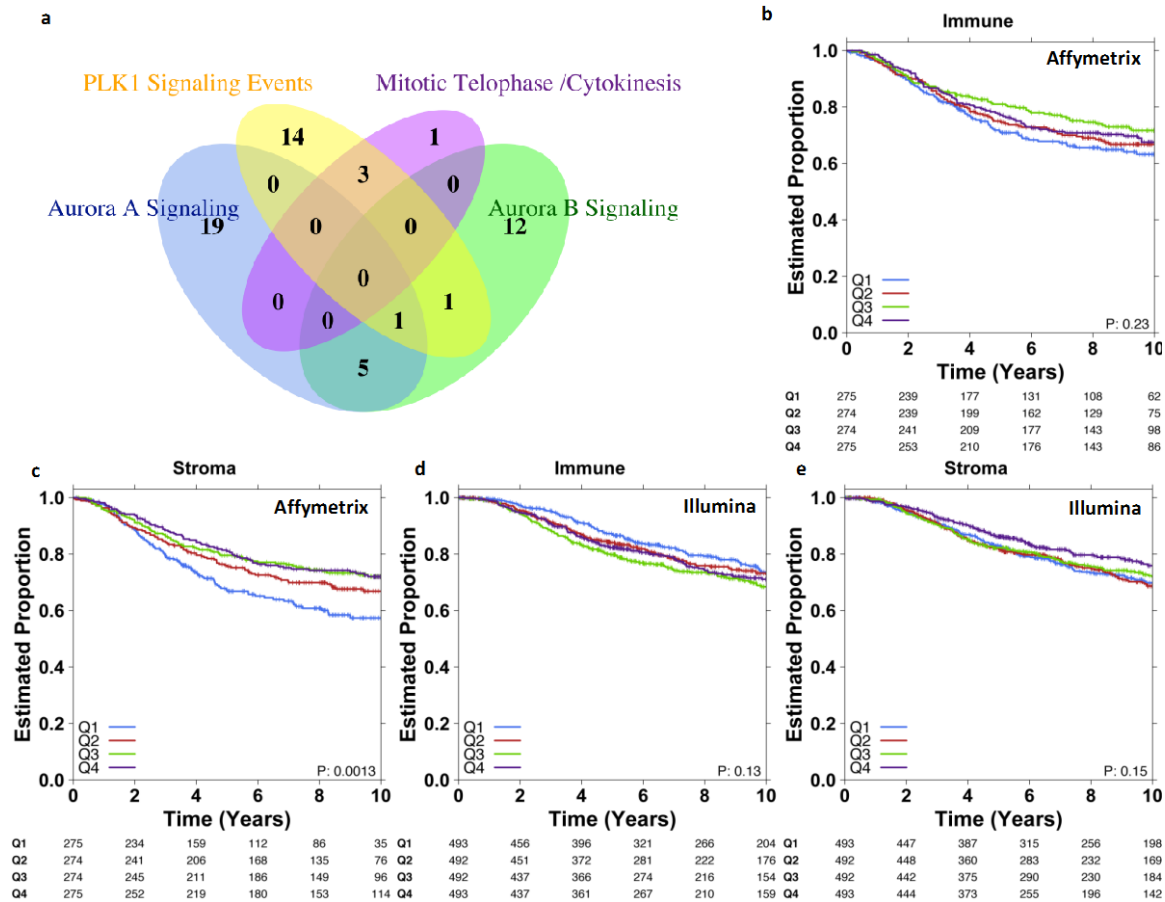

490

491 **Supplementary Figure 10**

492 **Overlap of genes in cell cycle subnetwork modules, and prognostic**

493 **assessment of immune and stromal scores. (a)** Venn diagram showing

494 overlapping genes between proliferation subnetwork modules derived from the

495 pathways of Aurora A signaling (module 1), Aurora B signaling (module 1), *PLK1*

496 signaling events (module 1) and Mitotic Telophase/Cytokinesis (module 1). The

497 maximal overlap was of a single gene (*AURKA*) common across three modules

498 (Aurora A, Aurora B and *PLK1* modules). Module number in parenthesis refers to

499 unique module number within a pathway in SIMMS' network database (SIMMS R

500 package). **(b, c)** Prognostic assessment of Immuno and Stromal scores

501 estimated using ESTIMATE in Affymetrix based breast cancer validation cohorts

502 **(Supplementary Table 2).** **(d, e)** Prognostic assessment of Immuno and Stromal

503 scores estimated using ESTIMATE in Illumina based Metabric breast cancer

504 cohort. For b-e, patient groups (Q1-Q4) were created using quantiles of  
 505 Immuno/Stromal scores.

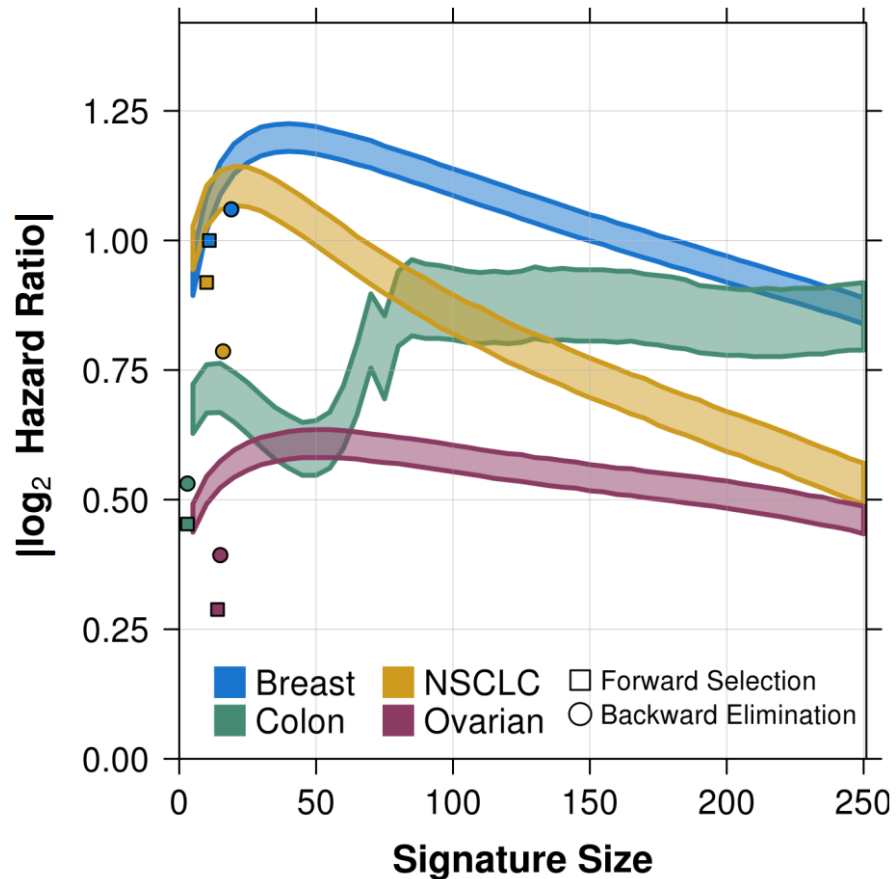

506  
 507

#### 508 **Supplementary Figure 11**

509 **Resampling of subnetworks database assessing sensitivity to initialisation**  
 510 **size of SIMMS' multivariate models.** Performance (SIMMS Model N) of breast,  
 511 colon, NSCLC and ovarian cancer candidate biomarkers represented as a  
 512 function of marker size. Jackknifing was performed over the subnetwork marker  
 513 space for various tumour types. Ten million unique markers (200,000 for each  
 514 marker size  $n=5,10,15,\dots,250$ ) were randomly sampled using all 500  
 515 subnetworks regardless of their size. All biomarkers were generated using two  
 516 independent machine learning paradigms; backward elimination and forward  
 517 selection. The prognostic performance of each candidate biomarker was  
 518 measured by taking the absolute value of the  $\log_2$ -transformed hazard ratio

519 estimated with a multivariate Cox proportional hazards model based on SIMMS  
 520 Model N scores. These randomization results depict a range of prognostic  
 521 performance between 75th and 95th percentiles at each marker size and were  
 522 used as a guide to estimate the optimal top *n* number of subnetwork modules  
 523 required to establish a multivariate classifier for a given tumour type.

524

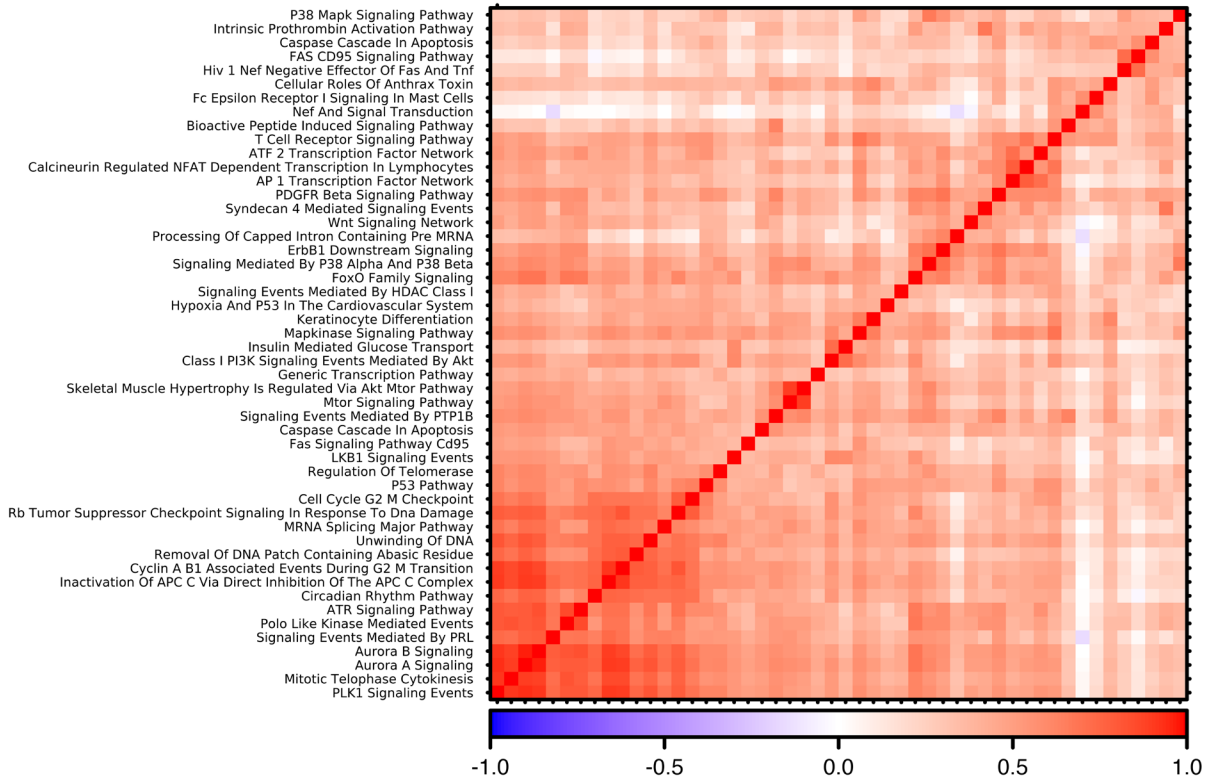

525

526 **Supplementary Figure 12**

527 **Co-expression of subnetwork risk scores in breast cancer.** Heatmap of  
 528 correlation and cluster analysis of patient's risk score of top ranked 50  
 529 subnetwork modules of breast cancer (validation datasets only). The plot  
 530 displays activity of subnetworks as well as clusters of highly co-expressed  
 531 modules as indicated in dark red clusters.



532

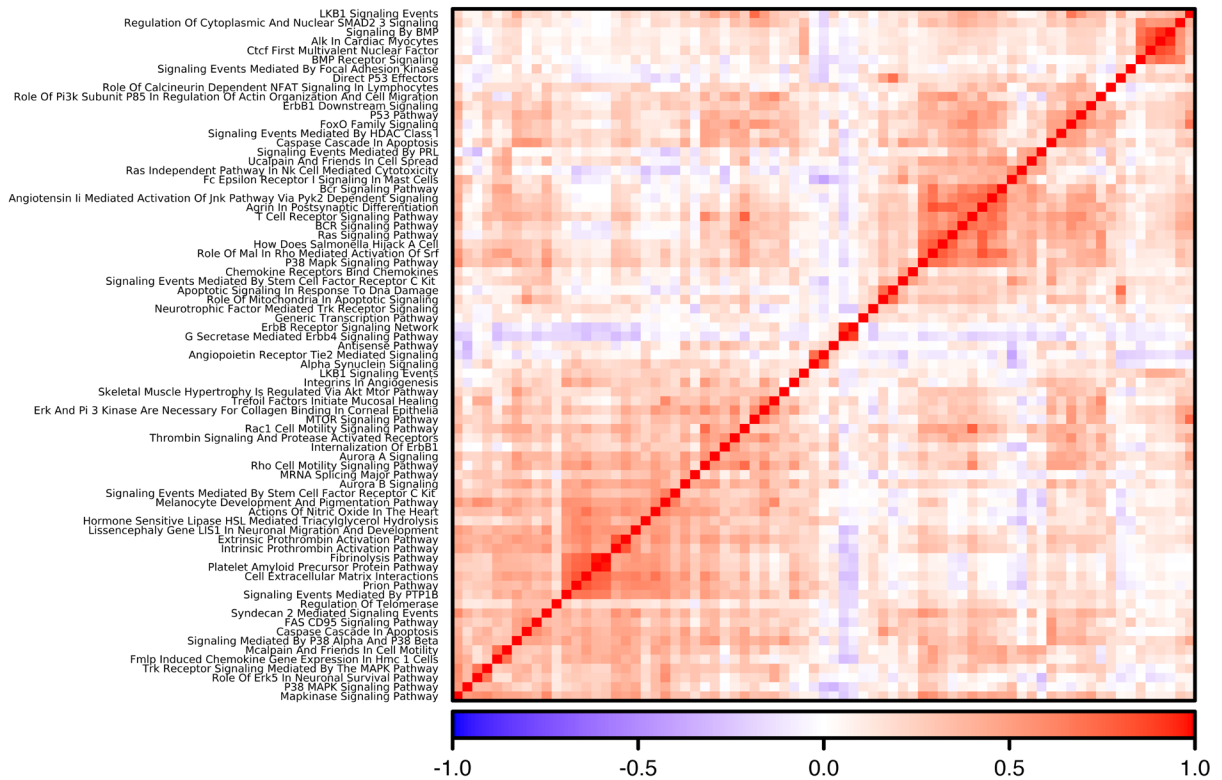

533

534 **Supplementary Figure 13**

535 **Co-expression of subnetwork risk scores in colon cancer.** Heatmap of  
 536 correlation and cluster analysis of patients' risk score of top ranked 75  
 537 subnetwork modules of colon cancer (validation datasets only). The plot displays  
 538 biological activity of subnetworks as well as clusters of highly co-expressed  
 539 modules as indicated in dark red clusters.

540

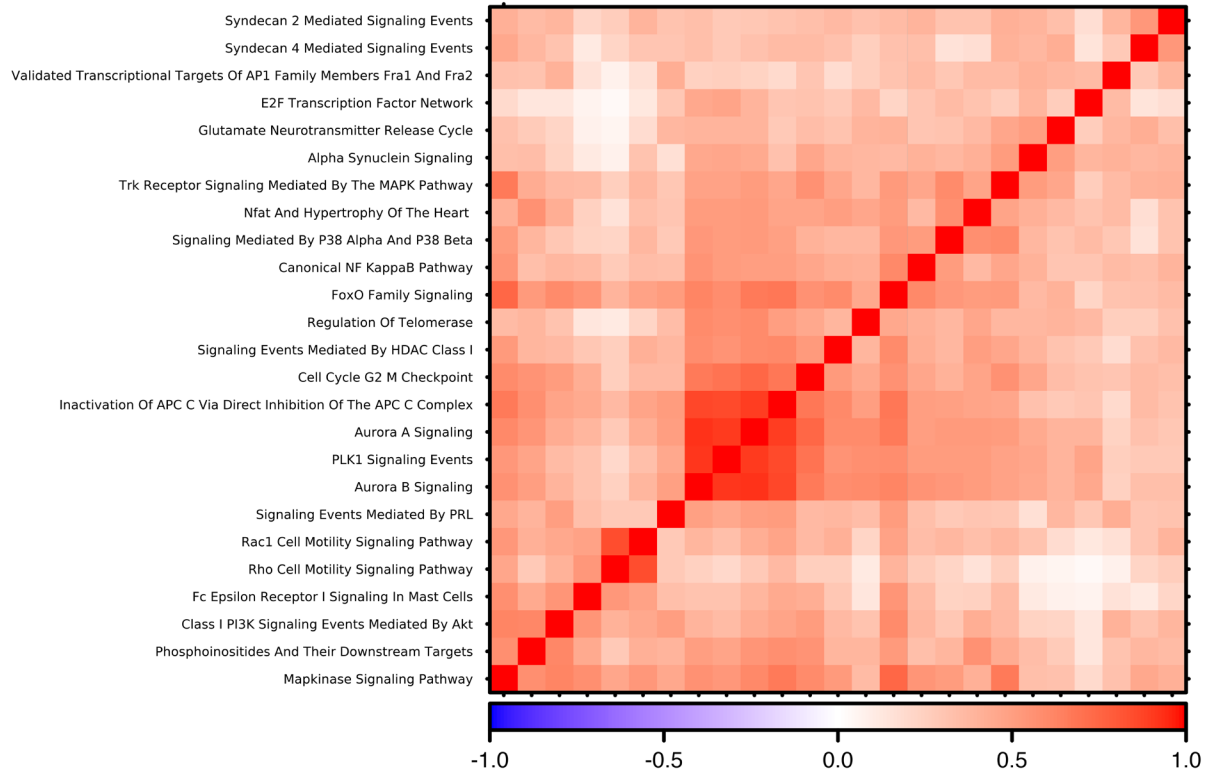

541

542 **Supplementary Figure 14**

543 **Co-expression of subnetwork risk scores in NSCLC.** Heatmap of correlation  
 544 and cluster analysis of patients' risk score of top ranked 25 subnetwork modules  
 545 of NSCLC (validation datasets only). The plot displays biological activity of  
 546 subnetworks as well as clusters of highly co-expressed modules as indicated in  
 547 dark red clusters.

548

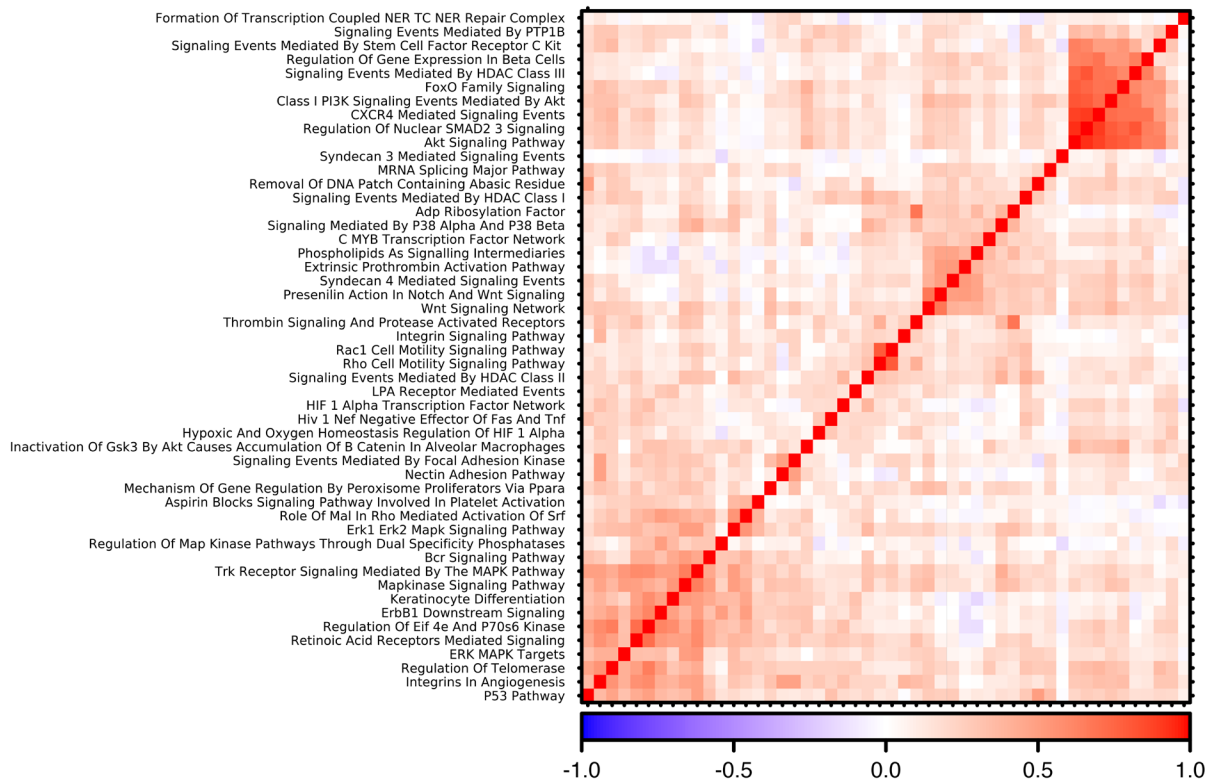

549

550 **Supplementary Figure 15**

551 **Co-expression of subnetwork risk scores in ovarian cancer.** Heatmap of  
 552 correlation and cluster analysis of patients' risk score of top ranked 50  
 553 subnetwork modules of ovarian cancer (validation datasets only). The plot  
 554 displays biological activity of subnetworks as well as clusters of highly co-  
 555 expressed modules as indicated in dark red clusters.

556

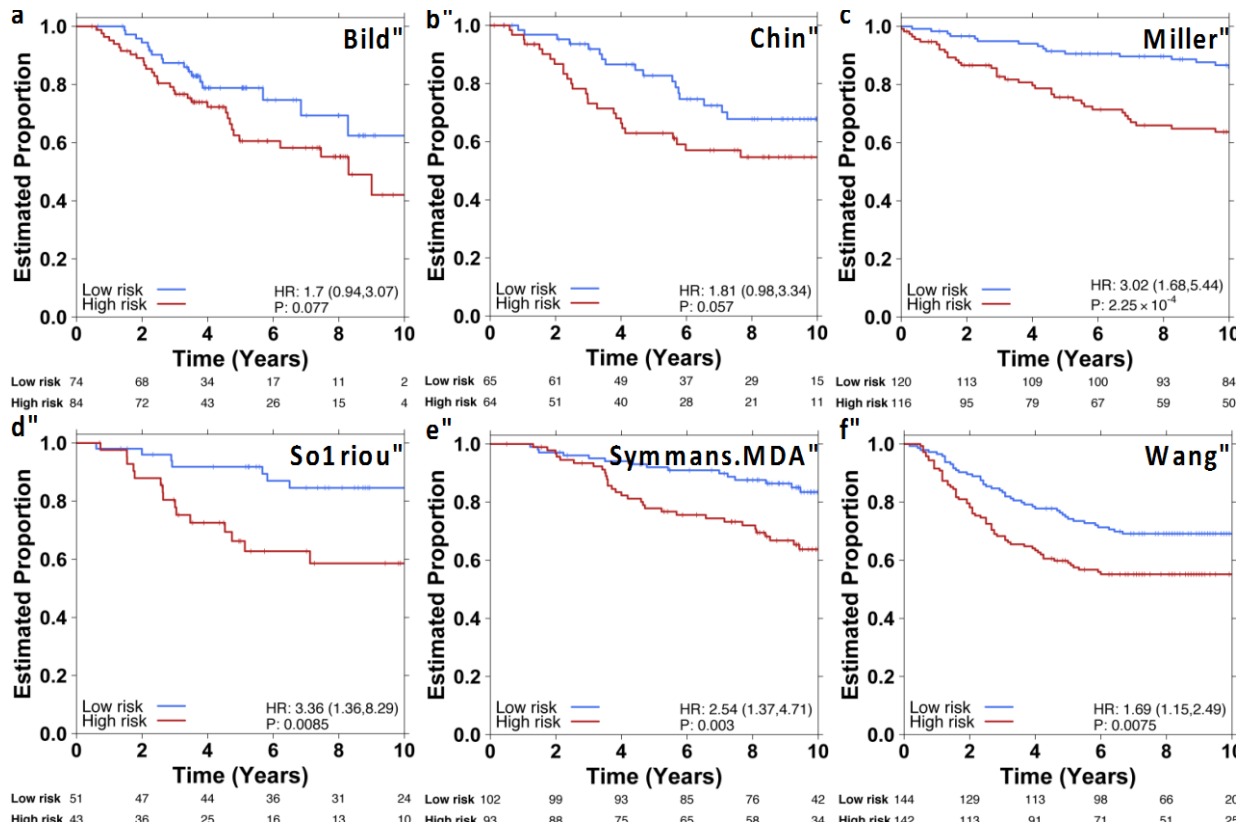

557

558 **Supplementary Figure 16**

559 **Independent validation in breast cancer cohorts.** Kaplan-Meier survival plots  
 560 using SIMMS' Model N on 6 breast cancer validation sets (**Supplementary**  
 561 **Table 2**) (10-year survival truncation) with subnetwork module selection  
 562 performed through generalized linear models with *L1*-regularization (10-fold  
 563 cross validation on training set). Model was initialised with the top ranked 50  
 564 subnetwork modules.

565

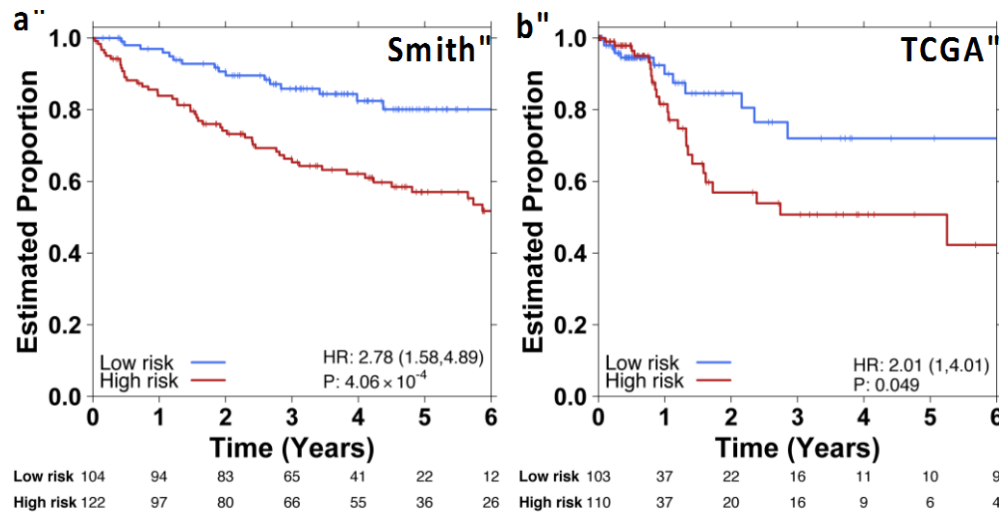

566

567 **Supplementary Figure 17**

568 **Independent validation in colon cancer cohorts.** Kaplan-Meier survival plots  
 569 using SIMMS' Model N on 2 colon cancer validation sets (**Supplementary Table**  
 570 **3**) (6-year survival truncation) with subnetwork module selection performed  
 571 through generalized linear models with  $L1$ -regularization (10-fold cross validation  
 572 on training set). Model was initialised with the top ranked 75 subnetwork  
 573 modules.

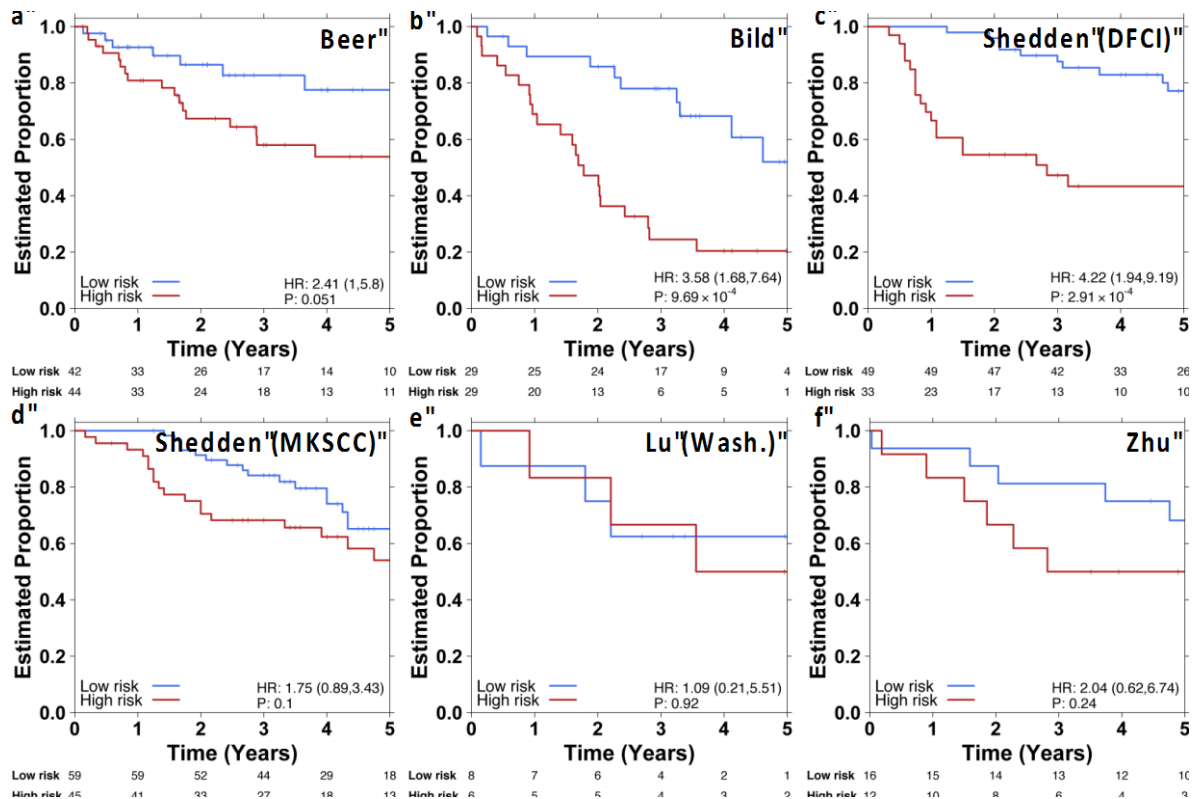

574

575 **Supplementary Figure 18**

576 **Independent validation in NSCLC cohorts.** Kaplan-Meier survival plots using  
 577 SIMMS' Model N on 6 NSCLC validation sets (**Supplementary Table 4**) (5-year  
 578 survival truncation) with subnetwork module selection performed through  
 579 generalized linear models with *L1*-regularization (10-fold cross validation on  
 580 training set). Model was initialised with the top ranked 25 subnetwork modules.

581

582

583

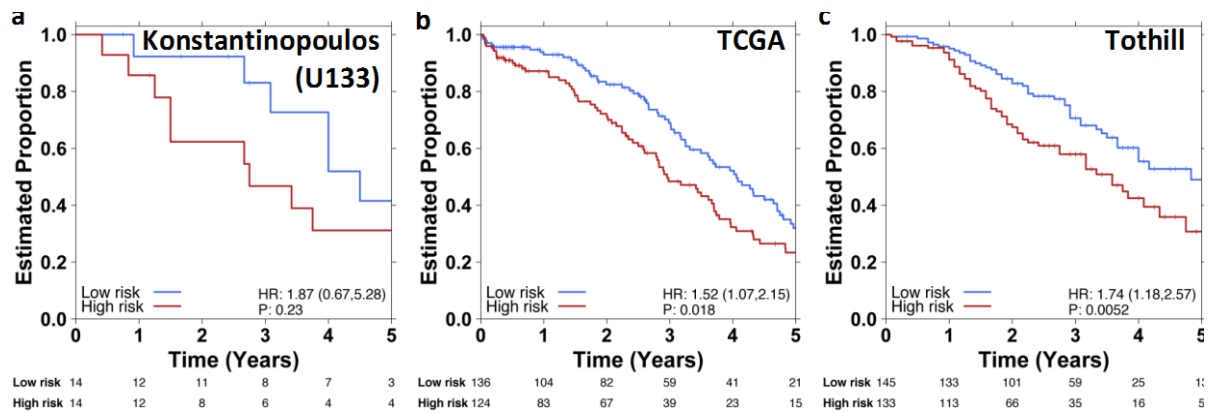

584

585 **Supplementary Figure 19**

586 **Independent validation in ovarian cancer cohorts.** Kaplan-Meier survival plots  
 587 using SIMMS' Model N on 3 ovarian cancer validation sets (**Supplementary**  
 588 **Table 5**) (5-year survival truncation) with subnetwork module selection performed  
 589 through generalized linear models with  $L_1$ -regularization (10-fold cross validation  
 590 on training set). Model was initialised with the top ranked 50 subnetwork  
 591 modules.

592

593

594

595

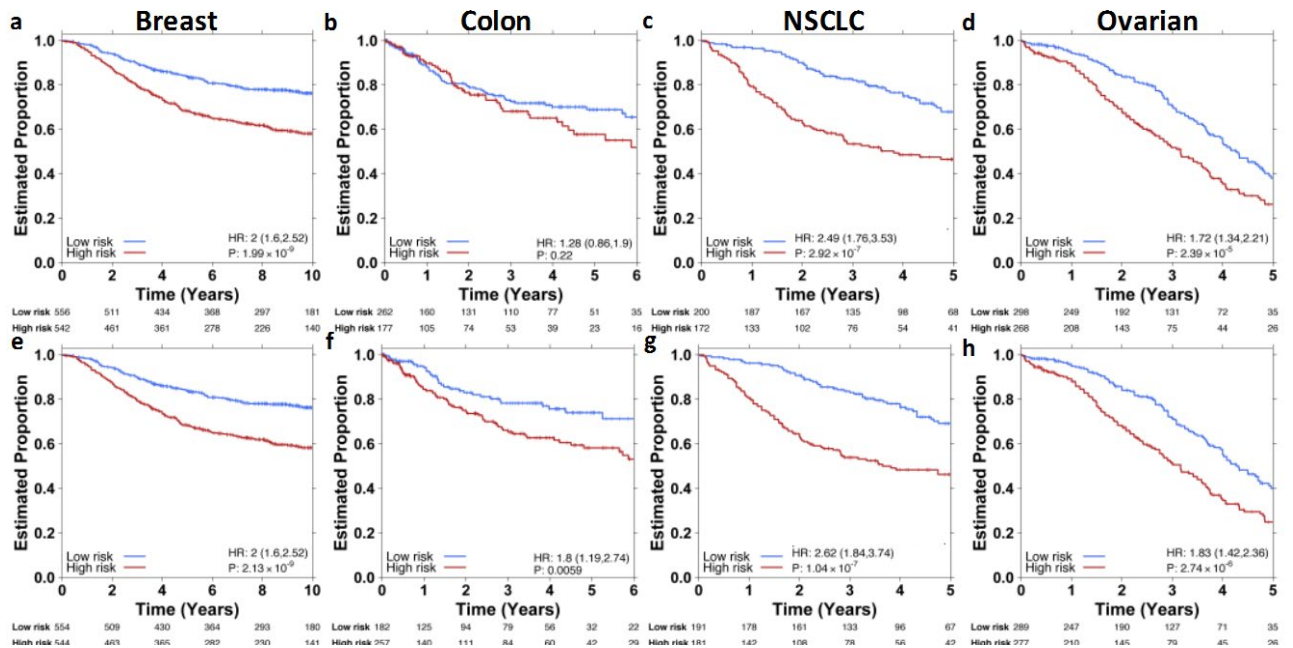

596

597 **Supplementary Figure 20**

598 **Assessment of alternative machine learning algorithms.** Kaplan-Meier  
 599 survival plots of SIMMS' Model N in validation cohorts of various tumour types  
 600 using alternative training algorithms; backwards elimination (**a-d**) and forward  
 601 selection (**e-h**).



602

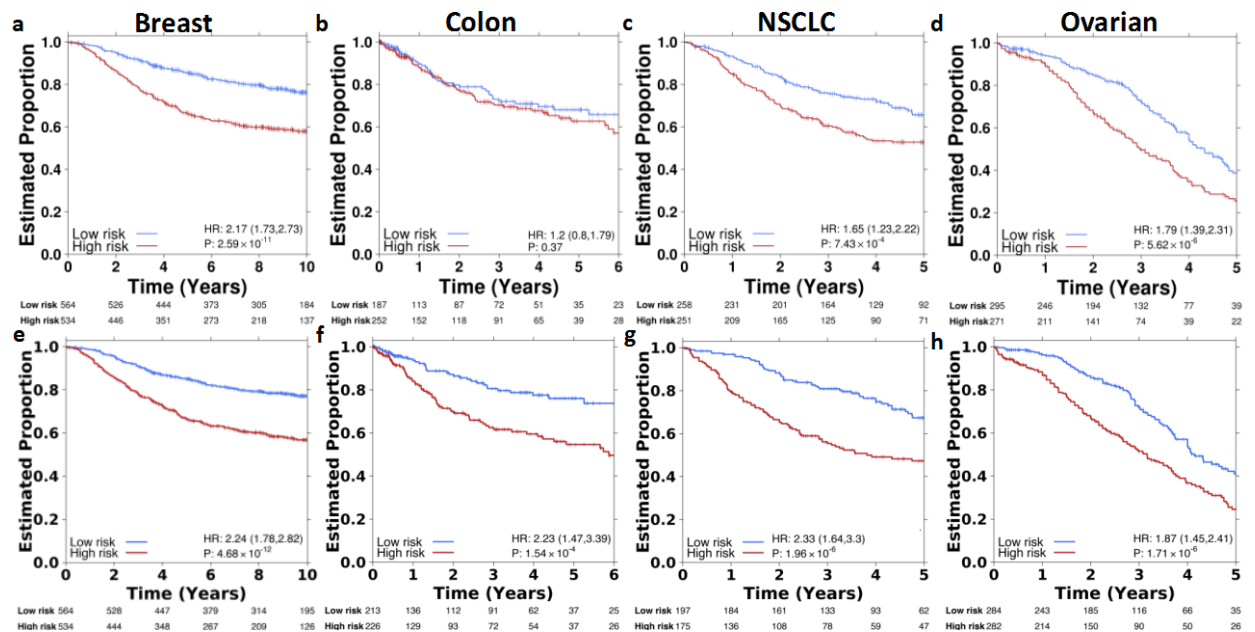

603

604 **Supplementary Figure 21**

605 **Prognostic assessment of naïve and SIMMS model with all the genes in the**  
 606 **subnetwork database.** Kaplan-Meier survival plots of validation sets in each  
 607 tumour type (a-d) for a Cox proportional hazard model using LASSO ( $L1$ -  
 608 regularization) with all genes contained in any subnetwork as model variables.  
 609 (e-h) Kaplan-Meier survival plots of validation sets in each tumour type for a Cox  
 610 proportional hazard model fitted using risk scores estimated by SIMMS on a  
 611 single module containing all the genes across all subnetworks.

612

613

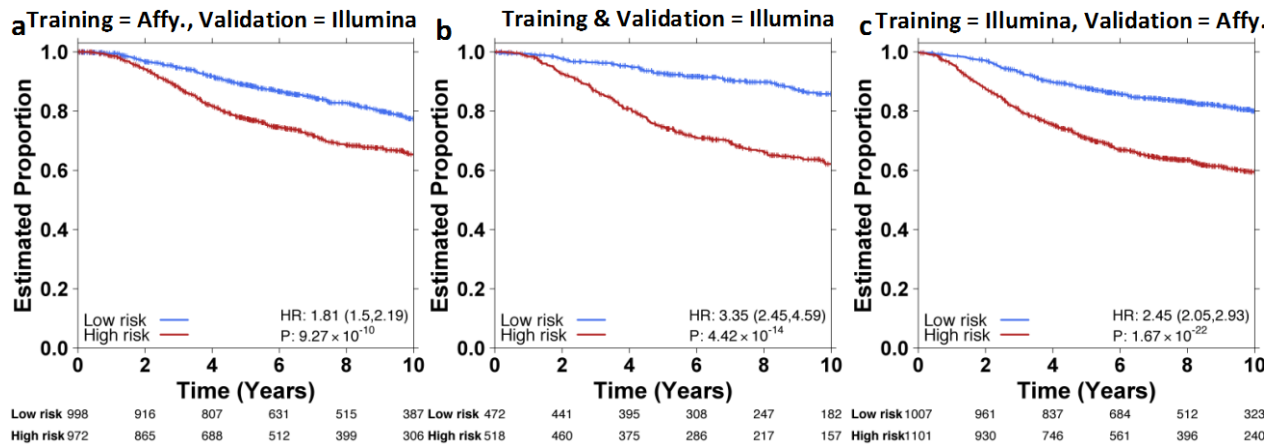

614

615 **Supplementary Figure 22**

616 **Reproducibility of SIMMS' models across mRNA quantification platforms.**

617 Kaplan-Meier survival plots of SIMMS' Model N based predictions on the  
 618 Metabric validation cohort. Separate classifiers were created using the Affymetrix  
 619 based breast cancer training cohorts (**Supplementary Table 2**) and Illumina  
 620 based breast cancer cohort (Metabric training set). These two classifiers were  
 621 validated on Illumina based breast cancer cohort (Metabric validation set) (**a,b**)  
 622 and Affymetrix based breast cancer validation cohorts, respectively (**c**). All  
 623 models were trained in 10-fold cross validation setting.

a''

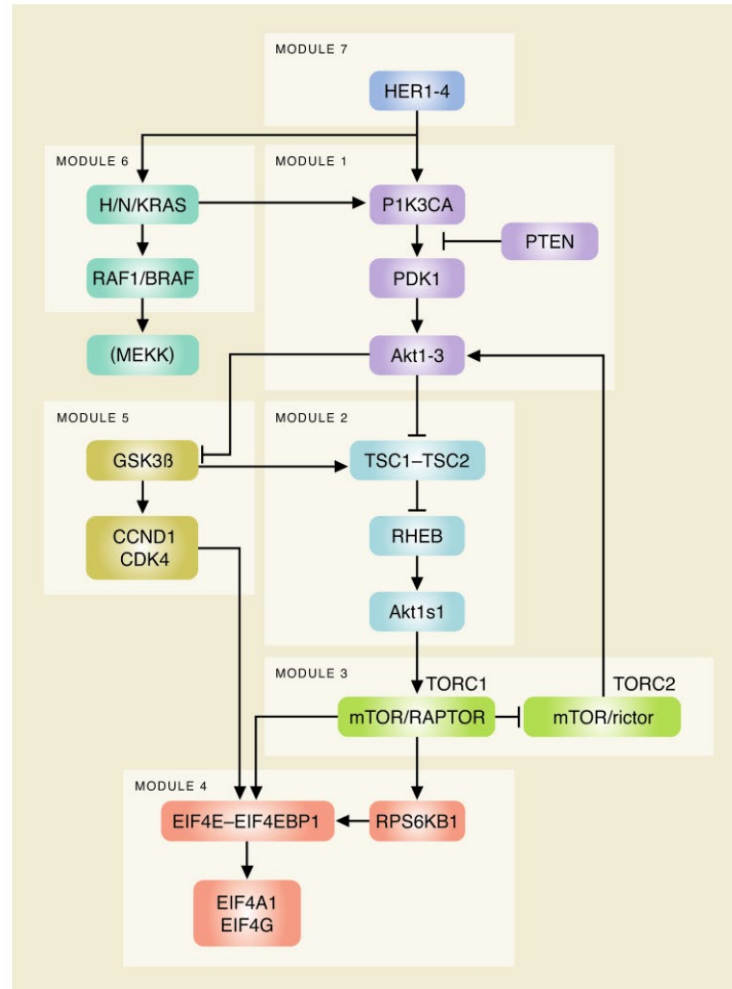

624

625

626 **Supplementary Figure 23**

627 **Schematic overview of the PI3K signalling pathway.** Figure illustrating key  
 628 relationships between modules assessed in the current study. Modules 1-7 are  
 629 highlighted with key signalling inter-relationships between the member genes.

630

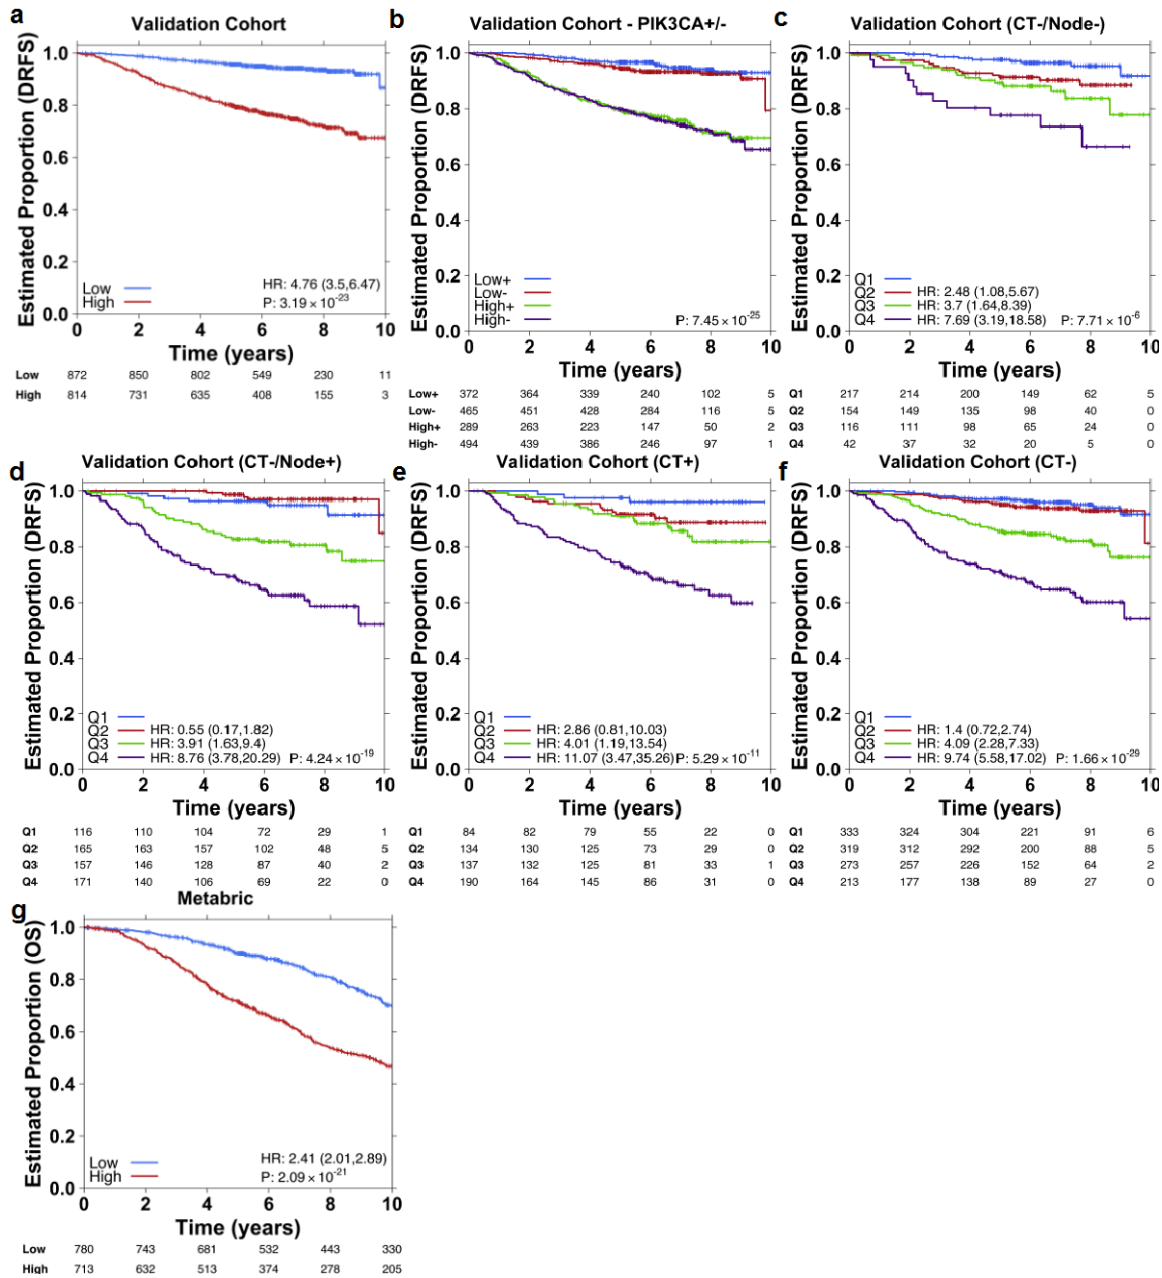

631

632 **Supplementary Figure 24**

633 **Validation of SIMMS' PI3K risk predictor.** (a) Prognostic assessment of  
 634 SIMMS' PI3K risk predictor by median-dichotomizing predicted risk scores into  
 635 low- and high-risk groups. (b) Prognostic assessment of model in (a) stratified by  
 636 PIK3CA mutations. Patients were classified into low- and high-risk groups, and

637 each was further divided by PIK3CA mutant (+) and wild-type (-) status. **(c-d)**  
638 Prognostic assessment of PI3K predictor on patients which were not treated with  
639 chemotherapy and were further stratified into node -ve and node +ve groups. **(e,**  
640 **f)** Prognostic performance assessment in patients with- and without  
641 chemotherapy arms of the validation cohort. Within each subgroup, risk score  
642 quartiles Q2-Q4 were compared against Q1 using Cox proportional hazards  
643 modelling and the log-rank test. **(g)** Validation of SIMMS' PI3K risk predictor  
644 (FFPE samples trained model) on ER+ subset of Metabric cohort (fresh frozen  
645 samples). Risk scores of Metabric samples were dichotomised using median risk  
646 score derived from TEAM cohort.

647

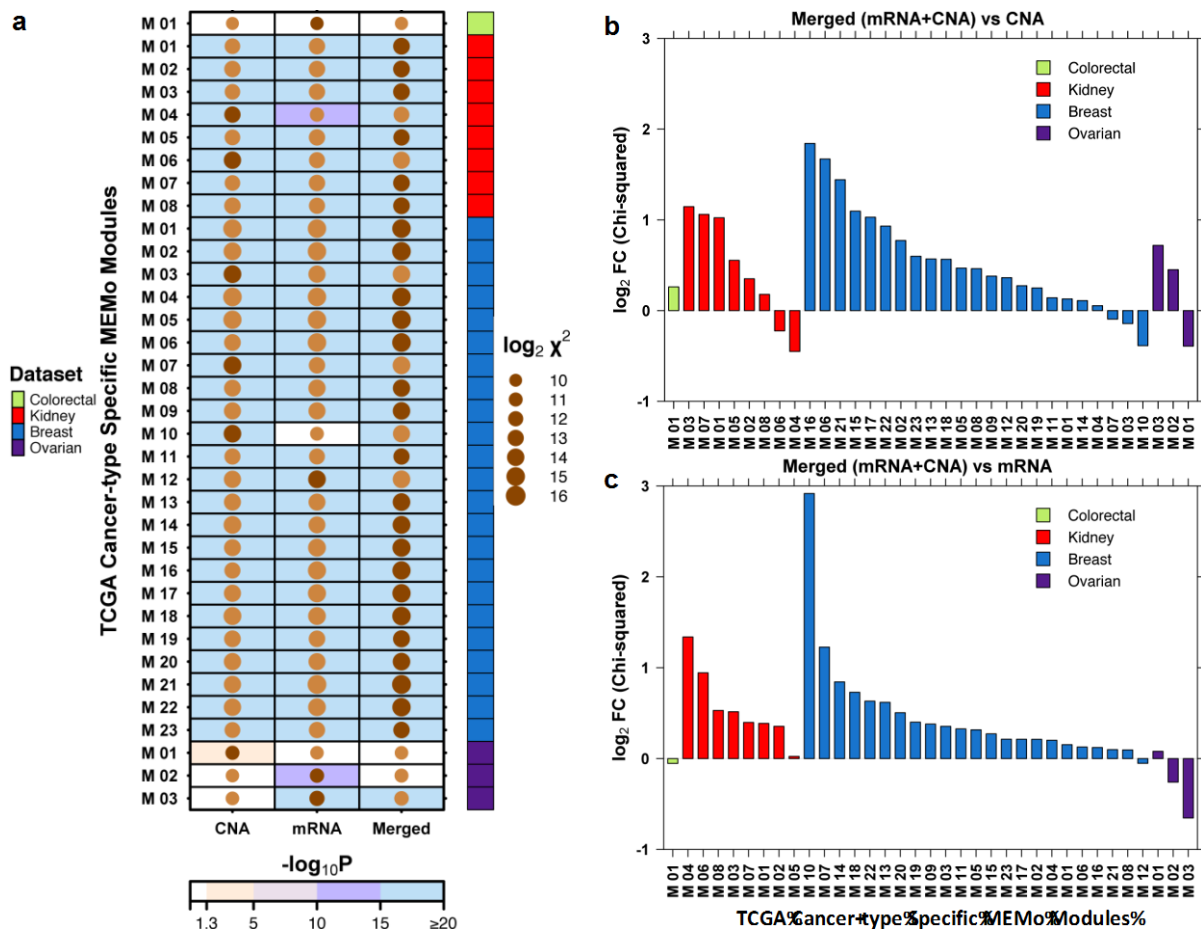

648

649 **Supplementary Figure 25**

650 **Multi-modal assessment of SIMMS.** Multi-modal prognostic biomarkers for  
 651 breast, colon, kidney and ovarian cancers. **(a)** Dot plot of summarised (Fisher's  
 652 combined probability test) chi-square estimates and P values for each of the  
 653 MEMo derived cancer-type specific subnetwork modules (Mx) (**Supplementary**  
 654 **Methods section 5, Supplementary Table 21**). Covariates represent colours of  
 655 each cancer type. Size of the dot represents  $\log(\text{chi-square})$  estimate resulting  
 656 from the meta-analysis of Cox P values (1000 random subsets for each profile in  
 657 each cancer type). A Cox proportional hazards model was fitted to dichotomous  
 658 risk scores across the entire validation cohort to assess survival association of  
 659 predicted risk groups. Crosses represent absence of a module from a particular  
 660 cancer type. **(b, c)** Performance comparison of multi-modal prognostic models

661 (Merged mRNA+CNA) against CNA models (b) and mRNA models (c) in each  
662 cancer type using MEMo modules of that particular cancer. Within each cancer  
663 type, modules are sorted by the largest fold-change in chi-squared values; with  
664 positive values indicating improved prognostication by the multi-modal model  
665 over CNA or mRNA models.

666

667

668 **Supplementary References**

669

- 670 1. Breitling, R., Armengaud, P., Amtmann, A. & Herzyk, P. Rank products: a  
671 simple, yet powerful, new method to detect differentially regulated genes in  
672 replicated microarray experiments. *FEBS Lett* **573**, 83-92 (2004).
- 673 2. Sotiriou, C. et al. Gene expression profiling in breast cancer: understanding  
674 the molecular basis of histologic grade to improve prognosis. *J Natl Cancer*  
675 *Inst* **98**, 262-272 (2006).
- 676 3. Symmans, W.F. et al. Genomic index of sensitivity to endocrine therapy for  
677 breast cancer. *J Clin Oncol* **28**, 4111-4119 (2010).
- 678 4. Lee, E., Chuang, H.Y., Kim, J.W., Ideker, T. & Lee, D. Inferring pathway activity  
679 toward precise disease classification. *PLoS Comput Biol* **4**, e1000217 (2008).
- 680 5. Guo, Z. et al. Towards precise classification of cancers based on robust gene  
681 functional expression profiles. *BMC Bioinformatics* **6**, 58 (2005).
- 682 6. Bild, A.H. et al. Oncogenic pathway signatures in human cancers as a guide to  
683 targeted therapies. *Nature* **439**, 353-357 (2006).
- 684 7. Bueno, R. et al. Comprehensive genomic analysis of malignant pleural  
685 mesothelioma identifies recurrent mutations, gene fusions and splicing  
686 alterations. *Nat Genet* **48**, 407-416 (2016).
- 687 8. Zhao, X. et al. Systematic assessment of prognostic gene signatures for breast  
688 cancer shows distinct influence of time and ER status. *BMC Cancer* **14**, 211  
689 (2014).
- 690 9. Oh, S.C. et al. Prognostic gene expression signature associated with two  
691 molecularly distinct subtypes of colorectal cancer. *Gut* **61**, 1291-1298 (2012).
- 692 10. Smith, J.J. et al. Experimentally derived metastasis gene expression profile  
693 predicts recurrence and death in patients with colon cancer.  
694 *Gastroenterology* **138**, 958-968 (2010).
- 695 11. Chen, H.Y. et al. A five-gene signature and clinical outcome in non-small-cell  
696 lung cancer. *The New England journal of medicine* **356**, 11-20 (2007).
- 697 12. Lau, S.K. et al. Three-gene prognostic classifier for early-stage non small-cell  
698 lung cancer. *Journal of clinical oncology : official journal of the American*  
699 *Society of Clinical Oncology* **25**, 5562-5569 (2007).
- 700 13. Shedden, K. et al. Gene expression-based survival prediction in lung  
701 adenocarcinoma: a multi-site, blinded validation study. *Nature medicine* **14**,  
702 822-827 (2008).
- 703 14. Boutros, P.C. et al. Prognostic gene signatures for non-small-cell lung cancer.  
704 *Proceedings of the National Academy of Sciences of the United States of*  
705 *America* **106**, 2824-2828 (2009).
- 706 15. Starmans, M.H. et al. Exploiting the noise: improving biomarkers with  
707 ensembles of data analysis methodologies. *Genome Med* **4**, 84 (2012).
- 708 16. Yoshihara, K. et al. High-risk ovarian cancer based on 126-gene expression  
709 signature is uniquely characterized by downregulation of antigen



- 710 presentation pathway. *Clinical cancer research : an official journal of the*  
711 *American Association for Cancer Research* **18**, 1374-1385 (2012).
- 712 17. The Cancer Genome Atlas Research Network Integrated genomic analyses of  
713 ovarian carcinoma. *Nature* **474**, 609-615 (2011).
- 714 18. Mankoo, P.K., Shen, R., Schultz, N., Levine, D.A. & Sander, C. Time to  
715 recurrence and survival in serous ovarian tumors predicted from integrated  
716 genomic profiles. *PLoS One* **6**, e24709 (2011).
- 717 19. Wu, G. & Stein, L. A network module-based method for identifying cancer  
718 prognostic signatures. *Genome biology* **13**, R112 (2012).
- 719 20. Waggott, D. et al. NanoStringNorm: an extensible R package for the pre-  
720 processing of NanoString mRNA and miRNA data. *Bioinformatics* **28**, 1546-  
721 1548 (2012).
- 722 21. Sabine, V.S. et al. Mutational analysis of PI3K/AKT signaling pathway in  
723 tamoxifen exemestane adjuvant multinational pathology study. *J Clin Oncol*  
724 **32**, 2951-2958 (2014).
- 725 22. Cuzick, J. et al. Prognostic value of a combined estrogen receptor,  
726 progesterone receptor, Ki-67, and human epidermal growth factor receptor 2  
727 immunohistochemical score and comparison with the Genomic Health  
728 recurrence score in early breast cancer. *J Clin Oncol* **29**, 4273-4278 (2011).
- 729 23. The Cancer Genome Atlas Research Network Comprehensive genomic  
730 characterization defines human glioblastoma genes and core pathways.  
731 *Nature* **455**, 1061-1068 (2008).
- 732 24. Ciriello, G., Cerami, E., Aksoy, B.A., Sander, C. & Schultz, N. Using MEMo to  
733 discover mutual exclusivity modules in cancer. *Curr Protoc Bioinformatics*  
734 **Chapter 8**, Unit 8 17 (2013).
- 735 25. Network, T.C.G.A. Comprehensive molecular portraits of human breast  
736 tumours. *Nature* **490**, 61-70 (2012).
- 737 26. Cancer Genome Atlas Research, N. Comprehensive molecular  
738 characterization of clear cell renal cell carcinoma. *Nature* **499**, 43-49 (2013).
- 739 27. The Cancer Genome Atlas Research Network Comprehensive molecular  
740 characterization of human colon and rectal cancer. *Nature* **487**, 330-337  
741 (2012).
- 742
